# Supplementary material
Source: Royal Society of Chemistry journal article supplement (doi:10.1039/d6fb00048g)
Supplement: d6fb00048g1.pdf [file d6fb00048g1.pdf]

**Supplementary table 1** The peptide sequences (probability in 1, no repeated) and bioactivity sequences identified in the digested liquid of SC-CO<sub>2</sub> defatted *spirulina* (SC-D-*Sp*) fermented fraction (solid and supernatant) after *in vitro* simulated gastrointestinal digestion

| Digested fraction    | Peptide.Sequence | ID           | Name of peptide                               | Activity             | Number        | Sequence | Location                                    |       |
|----------------------|------------------|--------------|-----------------------------------------------|----------------------|---------------|----------|---------------------------------------------|-------|
| digest-solid control | KIITHPNFNGNT     | 7624         | ACE inhibitor                                 | ACE inhibitor        | 1             | NG       | [9-10]                                      |       |
|                      |                  | 7683         | ACE inhibitor from garlic                     | ACE inhibitor        | 1             | NF       | [7-8]                                       |       |
|                      |                  | 7842         | ACE inhibitor                                 | ACE inhibitor        | 1             | HP       | [5-6]                                       |       |
|                      |                  | 8325         | Glucose uptake stimulating peptide            | stimulating          | 1             | II       | [2-3]                                       |       |
|                      | SGGGGGGLGSGGSI   | 7599         | ACE inhibitor                                 | ACE inhibitor        | 1             | GL       | [8-9]                                       |       |
|                      |                  | 7607         | ACE inhibitor                                 | ACE inhibitor        | 2             | GS       | [10-11],[13-14]                             |       |
|                      |                  | 7616         | ACE inhibitor                                 | ACE inhibitor        | 7             | GG       | [2-3],[3-4],[4-5],[5-6],[6-7],[7-8],[12-13] |       |
|                      |                  | 7618         | ACE inhibitor                                 | ACE inhibitor        | 2             | SG       | [1-2],[11-12]                               |       |
|                      |                  | 7619         | ACE inhibitor                                 | ACE inhibitor        | 1             | LG       | [9-10]                                      |       |
|                      |                  | ALVFVDNHDNQR | 3384                                          | ACE inhibitor        | ACE inhibitor | 1        | VF                                          | [3-4] |
|                      |                  |              | 10024                                         | ACE inhibitor        | ACE inhibitor | 1        | LVF                                         | [2-4] |
|                      | 8321             |              | Glucose uptake stimulating peptide            | stimulating          | 1             | LV       | [2-3]                                       |       |
|                      | SASSLGGFGGGS     | 7591         | ACE inhibitor                                 | ACE inhibitor        | 1             | GF       | [8-9]                                       |       |
|                      |                  | 7605         | ACE inhibitor                                 | ACE inhibitor        | 1             | FG       | [9-10]                                      |       |
|                      |                  | 7607         | ACE inhibitor                                 | ACE inhibitor        | 1             | GS       | [12-13]                                     |       |
|                      |                  | 7616         | ACE inhibitor                                 | ACE inhibitor        | 4             | GG       | [6-7],[7-8],[10-11],[11-12]                 |       |
|                      |                  | 7619         | ACE inhibitor                                 | ACE inhibitor        | 1             | LG       | [5-6]                                       |       |
|                      |                  | 9195         | ACE inhibitor                                 | ACE inhibitor        | 1             | FGG      | [9-11]                                      |       |
|                      |                  | 9955         | Regulator of phosphoglycerate kinase activity | regulating           | 1             | SL       | [4-5]                                       |       |
|                      |                  | 10618        | Inhibitor of Lactocepin                       | lactocepin inhibitor | 1             | LGG      | [5-7]                                       |       |
|                      | LGEHNIDVLEGNEQ   | 7615         | ACE inhibitor                                 | ACE inhibitor        | 1             | GE       | [2-3]                                       |       |
|                      |                  | 7619         | ACE inhibitor                                 | ACE inhibitor        | 1             | LG       | [1-2]                                       |       |
|                      |                  | 7622         | ACE inhibitor                                 | ACE inhibitor        | 1             | EG       | [10-11]                                     |       |
|                      |                  | 8320         | Glucose uptake stimulating peptide            | stimulating          | 1             | VL       | [8-9]                                       |       |
|                      |                  | 10795        | Neuropeptide                                  | neuropeptide         | 1             | EG       | [10-11]                                     |       |
|                      |                  | 10794        | Calcium binding peptide                       | binding              | 1             | EG       | [10-11]                                     |       |
|                      |                  | 10911        | Neprilysin inhibitor                          | neprilysin inhibitor | 1             | GE       | [2-3]                                       |       |

|                     |       |                                         |                                         |   |     |         |
|---------------------|-------|-----------------------------------------|-----------------------------------------|---|-----|---------|
| IITHPNFNGNTLDNDIM   | 7624  | ACE inhibitor                           | ACE inhibitor                           | 1 | NG  | [8-9]   |
|                     | 7683  | ACE inhibitor from garlic               | ACE inhibitor                           | 1 | NF  | [6-7]   |
|                     | 7842  | ACE inhibitor                           | ACE inhibitor                           | 1 | HP  | [4-5]   |
|                     | 8325  | Glucose uptake stimulating peptide      | stimulating                             | 1 | II  | [1-2]   |
|                     | 10744 | Hypouricemic peptide                    | hypouricemic                            | 1 | TL  | [11-12] |
| LVFVDNHDNQR         | 3384  | ACE inhibitor                           | ACE inhibitor                           | 1 | VF  | [2-3]   |
|                     | 10024 | ACE inhibitor                           | ACE inhibitor                           | 1 | LVF | [1-3]   |
|                     | 8321  | Glucose uptake stimulating peptide      | stimulating                             | 1 | LV  | [1-2]   |
| KIITHPNFNGNTLDNDIM  | 7624  | ACE inhibitor                           | ACE inhibitor                           | 1 | NG  | [9-10]  |
|                     | 7683  | ACE inhibitor from garlic               | ACE inhibitor                           | 1 | NF  | [7-8]   |
|                     | 7842  | ACE inhibitor                           | ACE inhibitor                           | 1 | HP  | [5-6]   |
|                     | 8325  | Glucose uptake stimulating peptide      | stimulating                             | 1 | II  | [2-3]   |
|                     | 10744 | Hypouricemic peptide                    | hypouricemic                            | 1 | TL  | [12-13] |
| ISNSAEDPFIAIH       | 7562  | ACE inhibitor from soy hydrolysate      | ACE inhibitor                           | 1 | IA  | [10-11] |
|                     | 8193  | ACE inhibitor                           | ACE inhibitor                           | 1 | AI  | [11-12] |
|                     | 10460 | ACE2 inhibitor                          | ACE2 inhibitor                          | 1 | PF  | [8-9]   |
| SISNSAEDPFIAIH      | 7562  | ACE inhibitor from soy hydrolysate      | ACE inhibitor                           | 1 | IA  | [11-12] |
|                     | 8193  | ACE inhibitor                           | ACE inhibitor                           | 1 | AI  | [12-13] |
|                     | 10460 | ACE2 inhibitor                          | ACE2 inhibitor                          | 1 | PF  | [9-10]  |
|                     | 10905 | Nepriylsin inhibitor                    | nepriylsin inhibitor                    | 1 | AE  | [6-7]   |
| LGEHNIDVLEGNEQFINAA | 10635 | Glutamate carboxypeptidase II inhibitor | glutamate carboxypeptidase II inhibitor | 1 | AE  | [6-7]   |
|                     | 7590  | ACE inhibitor                           | ACE inhibitor                           | 1 | AA  | [18-19] |
|                     | 7615  | ACE inhibitor                           | ACE inhibitor                           | 1 | GE  | [2-3]   |
|                     | 7619  | ACE inhibitor                           | ACE inhibitor                           | 1 | LG  | [1-2]   |
|                     | 7622  | ACE inhibitor                           | ACE inhibitor                           | 1 | EG  | [10-11] |
|                     | 10663 | Antibacterial peptide                   | antibacterial                           | 1 | AA  | [18-19] |
|                     | 8320  | Glucose uptake stimulating peptide      | stimulating                             | 1 | VL  | [8-9]   |
|                     | 10795 | Neuropeptide                            | neuropeptide                            | 1 | EG  | [10-11] |
|                     | 10794 | Calcium binding peptide                 | binding                                 | 1 | EG  | [10-11] |
|                     | 10141 | Hypotensive peptide                     | hypotensive                             | 1 | AA  | [18-19] |

|                      |               |                                         |                                         |               |    |               |       |
|----------------------|---------------|-----------------------------------------|-----------------------------------------|---------------|----|---------------|-------|
| SISNSAEDPFIAIHAESK   | 7562          | ACE inhibitor from soy hydrolysate      | ACE inhibitor                           | 1             | IA | [11-12]       |       |
|                      | 8193          | ACE inhibitor                           | ACE inhibitor                           | 1             | AI | [12-13]       |       |
|                      | 10460         | ACE2 inhibitor                          | ACE2 inhibitor                          | 1             | PF | [9-10]        |       |
|                      | 10905         | Neprilysin inhibitor                    | neprilysin inhibitor                    | 2             | AE | [6-7],[15-16] |       |
|                      | 10808         | Alanine carboxypeptidase inhibitor      | alanine carboxypeptidase inhibitor      | 1             | HA | [14-15]       |       |
|                      | 10635         | Glutamate carboxypeptidase II inhibitor | glutamate carboxypeptidase II inhibitor | 2             | AE | [6-7],[15-16] |       |
| LGEHNIDVLEGNEQFINAAK | 7590          | ACE inhibitor                           | ACE inhibitor                           | 1             | AA | [18-19]       |       |
|                      | 7615          | ACE inhibitor                           | ACE inhibitor                           | 1             | GE | [2-3]         |       |
|                      | 7619          | ACE inhibitor                           | ACE inhibitor                           | 1             | LG | [1-2]         |       |
|                      | 7622          | ACE inhibitor                           | ACE inhibitor                           | 1             | EG | [10-11]       |       |
|                      | 10920         | ACE inhibitor                           | ACE inhibitor                           | 1             | AK | [19-20]       |       |
|                      | 10663         | Antibacterial peptide                   | antibacterial                           | 1             | AA | [18-19]       |       |
|                      | 8320          | Glucose uptake stimulating peptide      | stimulating                             | 1             | VL | [8-9]         |       |
|                      | 10795         | Neuropeptide                            | neuropeptide                            | 1             | EG | [10-11]       |       |
|                      | 10794         | Calcium binding peptide                 | binding                                 | 1             | EG | [10-11]       |       |
|                      | 10141         | Hypotensive peptide                     | hypotensive                             | 1             | AA | [18-19]       |       |
|                      | 9431          | Renin inhibitor                         | renin inhibitor                         | 1             | QF | [14-15]       |       |
|                      | 10906         | Neprilysin inhibitor                    | neprilysin inhibitor                    | 1             | AK | [19-20]       |       |
|                      | NWGEGWGFMPSTR | 7579                                    | ACE inhibitor                           | ACE inhibitor | 1  | GW            | [5-6] |
|                      |               | 7591                                    | ACE inhibitor                           | ACE inhibitor | 1  | GF            | [7-8] |
| 7613                 |               | ACE inhibitor                           | ACE inhibitor                           | 2             | WG | [2-3],[6-7]   |       |
| 7615                 |               | ACE inhibitor                           | ACE inhibitor                           | 1             | GE | [3-4]         |       |
| 7622                 |               | ACE inhibitor                           | ACE inhibitor                           | 1             | EG | [4-5]         |       |
| 10091                |               | ACE inhibitor                           | ACE inhibitor                           | 1             | DR | [12-13]       |       |
| 10795                |               | Neuropeptide                            | neuropeptide                            | 1             | EG | [4-5]         |       |
| 9082                 |               | Antioxidative peptide                   | antioxidative                           | 2             | WG | [2-3],[6-7]   |       |
| 10472                |               | Antioxidative peptide                   | antioxidative                           | 1             | GW | [5-6]         |       |
| 10794                |               | Calcium binding peptide                 | binding                                 | 1             | EG | [4-5]         |       |
| IITHPNFNGNTLDNDIMLIK | 7624          | ACE inhibitor                           | ACE inhibitor                           | 1             | NG | [8-9]         |       |
|                      | 7683          | ACE inhibitor from garlic               | ACE inhibitor                           | 1             | NF | [6-7]         |       |

|                          |                   |       |                                         |                                         |   |     |         |
|--------------------------|-------------------|-------|-----------------------------------------|-----------------------------------------|---|-----|---------|
|                          |                   | 7842  | ACE inhibitor                           | ACE inhibitor                           | 1 | HP  | [4-5]   |
|                          |                   | 8324  | Glucose uptake stimulating peptide      | stimulating                             | 1 | LI  | [18-19] |
|                          |                   | 8325  | Glucose uptake stimulating peptide      | stimulating                             | 1 | II  | [1-2]   |
|                          |                   | 10744 | Hypouricemic peptide                    | hypouricemic                            | 1 | TL  | [11-12] |
| <b>digest-solid 5%LP</b> | KIITHPNFNGNT      | 7624  | ACE inhibitor                           | ACE inhibitor                           | 1 | NG  | [9-10]  |
|                          |                   | 7683  | ACE inhibitor from garlic               | ACE inhibitor                           | 1 | NF  | [7-8]   |
|                          |                   | 7842  | ACE inhibitor                           | ACE inhibitor                           | 1 | HP  | [5-6]   |
|                          |                   | 8325  | Glucose uptake stimulating peptide      | stimulating                             | 1 | II  | [2-3]   |
|                          | ALVFVDNHDNQR      | 3384  | ACE inhibitor                           | ACE inhibitor                           | 1 | VF  | [3-4]   |
|                          |                   | 10024 | ACE inhibitor                           | ACE inhibitor                           | 1 | LVF | [2-4]   |
|                          |                   | 8321  | Glucose uptake stimulating peptide      | stimulating                             | 1 | LV  | [2-3]   |
|                          | LGEHNIDVLEGNEQ    | 7615  | ACE inhibitor                           | ACE inhibitor                           | 1 | GE  | [2-3]   |
|                          |                   | 7619  | ACE inhibitor                           | ACE inhibitor                           | 1 | LG  | [1-2]   |
|                          |                   | 7622  | ACE inhibitor                           | ACE inhibitor                           | 1 | EG  | [10-11] |
|                          |                   | 8320  | Glucose uptake stimulating peptide      | stimulating                             | 1 | VL  | [8-9]   |
|                          |                   | 10795 | Neuropeptide                            | neuropeptide                            | 1 | EG  | [10-11] |
|                          |                   | 10794 | Calcium binding peptide                 | binding                                 | 1 | EG  | [10-11] |
|                          | IITHPNFNGNTLDNDIM | 7624  | ACE inhibitor                           | ACE inhibitor                           | 1 | NG  | [8-9]   |
|                          |                   | 7683  | ACE inhibitor from garlic               | ACE inhibitor                           | 1 | NF  | [6-7]   |
|                          |                   | 7842  | ACE inhibitor                           | ACE inhibitor                           | 1 | HP  | [4-5]   |
|                          |                   | 8325  | Glucose uptake stimulating peptide      | stimulating                             | 1 | II  | [1-2]   |
|                          |                   | 9496  | DPP-III inhibitor                       | dipeptidyl peptidase III inhibitor      | 1 | HP  | [4-5]   |
|                          |                   | 10744 | Hypouricemic peptide                    | hypouricemic                            | 1 | TL  | [11-12] |
|                          | SNSAEDPFIAIH      | 7562  | ACE inhibitor from soy hydrolysate      | ACE inhibitor                           | 1 | IA  | [9-10]  |
|                          |                   | 8193  | ACE inhibitor                           | ACE inhibitor                           | 1 | AI  | [10-11] |
|                          |                   | 10460 | ACE2 inhibitor                          | ACE2 inhibitor                          | 1 | PF  | [7-8]   |
|                          |                   | 10905 | Neprilysin inhibitor                    | neprilysin inhibitor                    | 1 | AE  | [4-5]   |
|                          |                   | 10635 | Glutamate carboxypeptidase II inhibitor | glutamate carboxypeptidase II inhibitor | 1 | AE  | [4-5]   |
|                          | LVFVDNHDNQR       | 3384  | ACE inhibitor                           | ACE inhibitor                           | 1 | VF  | [2-3]   |
|                          |                   | 10024 | ACE inhibitor                           | ACE inhibitor                           | 1 | LVF | [1-3]   |

|                     |       |                                    |                |   |    |         |
|---------------------|-------|------------------------------------|----------------|---|----|---------|
|                     | 8321  | Glucose uptake stimulating peptide | stimulating    | 1 | LV | [1-2]   |
| KIITHPNFNGNTLDNDIM  | 7624  | ACE inhibitor                      | ACE inhibitor  | 1 | NG | [9-10]  |
|                     | 7683  | ACE inhibitor from garlic          | ACE inhibitor  | 1 | NF | [7-8]   |
|                     | 7842  | ACE inhibitor                      | ACE inhibitor  | 1 | HP | [5-6]   |
|                     | 8325  | Glucose uptake stimulating peptide | stimulating    | 1 | II | [2-3]   |
|                     | 10744 | Hypouricemic peptide               | hypouricemic   | 1 | TL | [12-13] |
| SAEDPFIAHAESK       | 7562  | ACE inhibitor from soy hydrolysate | ACE inhibitor  | 1 | IA | [7-8]   |
|                     | 8193  | ACE inhibitor                      | ACE inhibitor  | 1 | AI | [8-9]   |
|                     | 10460 | ACE2 inhibitor                     | ACE2 inhibitor | 1 | PF | [5-6]   |
| SNSAEDPFIAHAESK     | 7562  | ACE inhibitor from soy hydrolysate | ACE inhibitor  | 1 | IA | [9-10]  |
|                     | 8193  | ACE inhibitor                      | ACE inhibitor  | 1 | AI | [10-11] |
|                     | 10460 | ACE2 inhibitor                     | ACE2 inhibitor | 1 | PF | [7-8]   |
| NSAEDPFIAHAESK      | 7562  | ACE inhibitor from soy hydrolysate | ACE inhibitor  | 1 | IA | [8-9]   |
|                     | 8193  | ACE inhibitor                      | ACE inhibitor  | 1 | AI | [9-10]  |
|                     | 10460 | ACE2 inhibitor                     | ACE2 inhibitor | 1 | PF | [6-7]   |
| GEHNIDVLEGNEQFINAAK | 7590  | ACE inhibitor                      | ACE inhibitor  | 1 | AA | [17-18] |
|                     | 7615  | ACE inhibitor                      | ACE inhibitor  | 1 | GE | [1-2]   |
|                     | 7622  | ACE inhibitor                      | ACE inhibitor  | 1 | EG | [9-10]  |
|                     | 10920 | ACE inhibitor                      | ACE inhibitor  | 1 | AK | [18-19] |
|                     | 10663 | Antibacterial peptide              | antibacterial  | 1 | AA | [17-18] |
|                     | 8320  | Glucose uptake stimulating peptide | stimulating    | 1 | VL | [7-8]   |
|                     | 10795 | Neuropeptide                       | neuropeptide   | 1 | EG | [9-10]  |
|                     | 10794 | Calcium binding peptide            | binding        | 1 | EG | [9-10]  |
|                     | 10141 | Hypotensive peptide                | hypotensive    | 1 | AA | [17-18] |
| SISNSAEDPFIAIH      | 7562  | ACE inhibitor from soy hydrolysate | ACE inhibitor  | 1 | IA | [11-12] |
|                     | 8193  | ACE inhibitor                      | ACE inhibitor  | 1 | AI | [12-13] |
|                     | 10460 | ACE2 inhibitor                     | ACE2 inhibitor | 1 | PF | [9-10]  |
| LGEHNIDVLEGNEQFINAA | 7590  | ACE inhibitor                      | ACE inhibitor  | 1 | AA | [18-19] |
|                     | 7615  | ACE inhibitor                      | ACE inhibitor  | 1 | GE | [2-3]   |
|                     | 7619  | ACE inhibitor                      | ACE inhibitor  | 1 | LG | [1-2]   |

|                      |       |                                    |                |   |    |             |
|----------------------|-------|------------------------------------|----------------|---|----|-------------|
|                      | 7622  | ACE inhibitor                      | ACE inhibitor  | 1 | EG | [10-11]     |
|                      | 10663 | Antibacterial peptide              | antibacterial  | 1 | AA | [18-19]     |
|                      | 8320  | Glucose uptake stimulating peptide | stimulating    | 1 | VL | [8-9]       |
|                      | 10795 | Neuropeptide                       | neuropeptide   | 1 | EG | [10-11]     |
|                      | 10794 | Calcium binding peptide            | binding        | 1 | EG | [10-11]     |
|                      | 10141 | Hypotensive peptide                | hypotensive    | 1 | AA | [18-19]     |
| SISNSAEDPFIAIHAESK   | 7562  | ACE inhibitor from soy hydrolysate | ACE inhibitor  | 1 | IA | [11-12]     |
|                      | 8193  | ACE inhibitor                      | ACE inhibitor  | 1 | AI | [12-13]     |
|                      | 10460 | ACE2 inhibitor                     | ACE2 inhibitor | 1 | PF | [9-10]      |
| LGEHNIDVLEGNEQFINAAK | 7590  | ACE inhibitor                      | ACE inhibitor  | 1 | AA | [18-19]     |
|                      | 7615  | ACE inhibitor                      | ACE inhibitor  | 1 | GE | [2-3]       |
|                      | 7619  | ACE inhibitor                      | ACE inhibitor  | 1 | LG | [1-2]       |
|                      | 7622  | ACE inhibitor                      | ACE inhibitor  | 1 | EG | [10-11]     |
|                      | 10920 | ACE inhibitor                      | ACE inhibitor  | 1 | AK | [19-20]     |
|                      | 10663 | Antibacterial peptide              | antibacterial  | 1 | AA | [18-19]     |
|                      | 8320  | Glucose uptake stimulating peptide | stimulating    | 1 | VL | [8-9]       |
|                      | 10795 | Neuropeptide                       | neuropeptide   | 1 | EG | [10-11]     |
|                      | 10794 | Calcium binding peptide            | binding        | 1 | EG | [10-11]     |
|                      | 10141 | Hypotensive peptide                | hypotensive    | 1 | AA | [18-19]     |
| NWGEGWGFMPSTR        | 7579  | ACE inhibitor                      | ACE inhibitor  | 1 | GW | [5-6]       |
|                      | 7591  | ACE inhibitor                      | ACE inhibitor  | 1 | GF | [7-8]       |
|                      | 7613  | ACE inhibitor                      | ACE inhibitor  | 2 | WG | [2-3],[6-7] |
|                      | 7615  | ACE inhibitor                      | ACE inhibitor  | 1 | GE | [3-4]       |
|                      | 7622  | ACE inhibitor                      | ACE inhibitor  | 1 | EG | [4-5]       |
|                      | 10091 | ACE inhibitor                      | ACE inhibitor  | 1 | DR | [12-13]     |
|                      | 10795 | Neuropeptide                       | neuropeptide   | 1 | EG | [4-5]       |
|                      | 9082  | antioxidative peptide              | antioxidative  | 2 | WG | [2-3],[6-7] |
|                      | 10472 | antioxidative peptide              | antioxidative  | 1 | GW | [5-6]       |
|                      | 10794 | Calcium binding peptide            | binding        | 1 | EG | [4-5]       |
| IITHPNFNGNTLDNDIMLIK | 7624  | ACE inhibitor                      | ACE inhibitor  | 1 | NG | [8-9]       |

|                          |                      |       |                                          |               |   |     |                                          |
|--------------------------|----------------------|-------|------------------------------------------|---------------|---|-----|------------------------------------------|
|                          |                      | 7683  | ACE inhibitor from garlic                | ACE inhibitor | 1 | NF  | [6-7]                                    |
|                          |                      | 7842  | ACE inhibitor                            | ACE inhibitor | 1 | HP  | [4-5]                                    |
|                          |                      | 10744 | Hypouricemic peptide                     | hypouricemic  | 1 | TL  | [11-12]                                  |
| <b>digest-solid 5%LC</b> | GGSGGSHGGGSGFGGESGGS | 7591  | ACE inhibitor                            | ACE inhibitor | 1 | GF  | [12-13]                                  |
|                          |                      | 7605  | ACE inhibitor                            | ACE inhibitor | 1 | FG  | [13-14]                                  |
|                          |                      | 7607  | ACE inhibitor                            | ACE inhibitor | 4 | GS  | [2-3],[5-6],[10-11],[19-20]              |
|                          |                      | 7614  | ACE inhibitor                            | ACE inhibitor | 1 | HG  | [7-8]                                    |
|                          |                      | 7615  | ACE inhibitor                            | ACE inhibitor | 1 | GE  | [15-16]                                  |
|                          |                      | 7616  | ACE inhibitor                            | ACE inhibitor | 6 | GG  | [1-2],[4-5],[8-9],[9-10],[14-15],[18-19] |
|                          |                      | 7618  | ACE inhibitor                            | ACE inhibitor | 3 | SG  | [3-4],[11-12],[17-18]                    |
|                          |                      | 9035  | ACE inhibitor                            | ACE inhibitor | 1 | GSH | [5-7]                                    |
|                          |                      | 9195  | ACE inhibitor                            | ACE inhibitor | 1 | FGG | [13-15]                                  |
|                          |                      | 8114  | Antioxidative peptide                    | antioxidative | 1 | GGE | [14-16]                                  |
|                          |                      | 9954  | Antioxidative peptide                    | antioxidative | 1 | GSH | [5-7]                                    |
|                          | KYDDIDAAPEEK         | 3375  | ACE inhibitor                            | ACE inhibitor | 1 | AAP | [7-9]                                    |
|                          |                      | 7584  | ACE inhibitor                            | ACE inhibitor | 1 | AP  | [8-9]                                    |
|                          |                      | 7590  | ACE inhibitor                            | ACE inhibitor | 1 | AA  | [7-8]                                    |
|                          |                      | 7606  | ACE inhibitor                            | ACE inhibitor | 1 | DA  | [6-7]                                    |
|                          |                      | 7691  | ACE inhibitor from wakame                | ACE inhibitor | 1 | KY  | [1-2]                                    |
|                          |                      | 7840  | ACE inhibitor                            | ACE inhibitor | 1 | EK  | [11-12]                                  |
|                          |                      | 10663 | antibacterial peptide                    | antibacterial | 1 | AA  | [7-8]                                    |
|                          |                      | 8329  | Stimulating vasoactive substance release | stimulating   | 1 | EE  | [10-11]                                  |
|                          |                      | 10141 | Hypotensive peptide                      | hypotensive   | 1 | AA  | [7-8]                                    |
|                          | KIITHPNFNGNT         | 7624  | ACE inhibitor                            | ACE inhibitor | 1 | NG  | [9-10]                                   |
|                          |                      | 7683  | ACE inhibitor from garlic                | ACE inhibitor | 1 | NF  | [7-8]                                    |
|                          |                      | 7842  | ACE inhibitor                            | ACE inhibitor | 1 | HP  | [5-6]                                    |
|                          |                      | 8325  | Glucose uptake stimulating peptide       | stimulating   | 1 | II  | [2-3]                                    |
|                          | GGVQVSPNEN           | 3538  | ACE inhibitor                            | ACE inhibitor | 1 | VSP | [5-7]                                    |
|                          |                      | 7608  | ACE inhibitor                            | ACE inhibitor | 1 | GV  | [2-3]                                    |
|                          |                      | 7616  | ACE inhibitor                            | ACE inhibitor | 1 | GG  | [1-2]                                    |

|                 |       |                                            |                                            |   |     |                                                                |
|-----------------|-------|--------------------------------------------|--------------------------------------------|---|-----|----------------------------------------------------------------|
|                 | 7836  | ACE inhibitor                              | ACE inhibitor                              | 1 | PP  | [7-8]                                                          |
|                 | 9046  | ACE inhibitor                              | ACE inhibitor                              | 1 | VQV | [3-5]                                                          |
|                 | 9363  | Antioxidative peptide                      | antioxidative                              | 1 | NEN | [9-11]                                                         |
| SGGGGGGLGSGGSI  | 7599  | ACE inhibitor                              | ACE inhibitor                              | 1 | GL  | [8-9]                                                          |
|                 | 7607  | ACE inhibitor                              | ACE inhibitor                              | 2 | GS  | [10-11],[13-14]                                                |
|                 | 7616  | ACE inhibitor                              | ACE inhibitor                              | 7 | GG  | [2-3],[3-4],[4-5],[5-6],[6-7],[7-8],[12-13]                    |
|                 | 7618  | ACE inhibitor                              | ACE inhibitor                              | 2 | SG  | [1-2],[11-12]                                                  |
|                 | 7619  | ACE inhibitor                              | ACE inhibitor                              | 1 | LG  | [9-10]                                                         |
| LVFVDNHDNQ      | 3384  | ACE inhibitor                              | ACE inhibitor                              | 1 | VF  | [2-3]                                                          |
|                 | 10024 | ACE inhibitor                              | ACE inhibitor                              | 1 | LVF | [1-3]                                                          |
|                 | 8321  | Glucose uptake stimulating peptide         | stimulating                                | 1 | LV  | [1-2]                                                          |
| GSGGGGFGGGFGGGG | 7591  | ACE inhibitor                              | ACE inhibitor                              | 2 | GF  | [6-7],[11-12]                                                  |
|                 | 7605  | ACE inhibitor                              | ACE inhibitor                              | 2 | FG  | [7-8],[12-13]                                                  |
|                 | 7607  | ACE inhibitor                              | ACE inhibitor                              | 1 | GS  | [1-2]                                                          |
|                 | 7616  | ACE inhibitor                              | ACE inhibitor                              | 9 | GG  | [3-4],[4-5],[5-6],[8-9],[9-10],[10-11],[13-14],[14-15],[15-16] |
|                 | 7618  | ACE inhibitor                              | ACE inhibitor                              | 1 | SG  | [2-3]                                                          |
|                 | 9195  | ACE inhibitor                              | ACE inhibitor                              | 2 | FGG | [7-9],[12-14]                                                  |
|                 | 10601 | Inhibitor of cytosol alanyl aminopeptidase | inhibitor of cytosol alanyl aminopeptidase | 2 | GGF | [5-7],[10-12]                                                  |
| ALVFVDNHDNQ     | 3384  | ACE inhibitor                              | ACE inhibitor                              | 1 | VF  | [3-4]                                                          |
|                 | 10024 | ACE inhibitor                              | ACE inhibitor                              | 1 | LVF | [2-4]                                                          |
|                 | 8321  | Glucose uptake stimulating peptide         | stimulating                                | 1 | LV  | [2-3]                                                          |
| IITHPNFNGNT     | 7624  | ACE inhibitor                              | ACE inhibitor                              | 1 | NG  | [8-9]                                                          |
|                 | 7683  | ACE inhibitor from garlic                  | ACE inhibitor                              | 1 | NF  | [6-7]                                                          |
|                 | 7842  | ACE inhibitor                              | ACE inhibitor                              | 1 | HP  | [4-5]                                                          |
|                 | 8325  | Glucose uptake stimulating peptide         | stimulating                                | 1 | II  | [1-2]                                                          |
| LGEHNIDVLEGNEQ  | 7615  | ACE inhibitor                              | ACE inhibitor                              | 1 | GE  | [2-3]                                                          |
|                 | 7619  | ACE inhibitor                              | ACE inhibitor                              | 1 | LG  | [1-2]                                                          |
|                 | 7622  | ACE inhibitor                              | ACE inhibitor                              | 1 | EG  | [10-11]                                                        |
|                 | 8320  | Glucose uptake stimulating peptide         | stimulating                                | 1 | VL  | [8-9]                                                          |
|                 | 10795 | Neuropeptide                               | neuropeptide                               | 1 | EG  | [10-11]                                                        |

|                   |       |                                                          |                |   |     |         |
|-------------------|-------|----------------------------------------------------------|----------------|---|-----|---------|
|                   | 10794 | Calcium binding peptide                                  | binding        | 1 | EG  | [10-11] |
| GFGGVQVSPNEN      | 3538  | ACE inhibitor                                            | ACE inhibitor  | 1 | VSP | [7-9]   |
|                   | 7591  | ACE inhibitor                                            | ACE inhibitor  | 1 | GF  | [1-2]   |
|                   | 7605  | ACE inhibitor                                            | ACE inhibitor  | 1 | FG  | [2-3]   |
|                   | 7608  | ACE inhibitor                                            | ACE inhibitor  | 1 | GV  | [4-5]   |
|                   | 7616  | ACE inhibitor                                            | ACE inhibitor  | 1 | GG  | [3-4]   |
|                   | 7836  | ACE inhibitor                                            | ACE inhibitor  | 1 | PP  | [9-10]  |
|                   | 9046  | ACE inhibitor                                            | ACE inhibitor  | 1 | VQV | [5-7]   |
|                   | 9195  | ACE inhibitor                                            | ACE inhibitor  | 1 | FGG | [2-4]   |
|                   | 9363  | Antioxidative peptide                                    | antioxidative  | 1 | NEN | [11-13] |
| SSYPGQITGNMI      | 3460  | Prolyl endopeptidase inhibitor                           | antiamnestic   | 1 | PG  | [4-5]   |
|                   | 3666  | ACE inhibitor                                            | ACE inhibitor  | 1 | YP  | [3-4]   |
|                   | 7610  | ACE inhibitor                                            | ACE inhibitor  | 1 | GQ  | [5-6]   |
|                   | 7621  | ACE inhibitor                                            | ACE inhibitor  | 1 | TG  | [8-9]   |
|                   | 7625  | ACE inhibitor                                            | ACE inhibitor  | 1 | PG  | [4-5]   |
|                   | 7684  | ACE inhibitor from garlic                                | ACE inhibitor  | 1 | SY  | [2-3]   |
|                   | 9066  | ACE inhibitor                                            | ACE inhibitor  | 1 | YPG | [3-5]   |
|                   | 3285  | Antithrombotic peptide                                   | antithrombotic | 1 | PG  | [4-5]   |
|                   | 2890  | neuropeptide                                             | neuropeptide   | 1 | GQ  | [5-6]   |
|                   | 2754  | peptide regulating the stomach mucosal membrane activity | regulating     | 1 | PG  | [4-5]   |
| SSGSSYPSSLQ       | 3666  | ACE inhibitor                                            | ACE inhibitor  | 1 | YP  | [6-7]   |
|                   | 7607  | ACE inhibitor                                            | ACE inhibitor  | 1 | GS  | [3-4]   |
|                   | 7618  | ACE inhibitor                                            | ACE inhibitor  | 1 | SG  | [2-3]   |
|                   | 7684  | ACE inhibitor from garlic                                | ACE inhibitor  | 1 | SY  | [5-6]   |
|                   | 7831  | ACE inhibitor                                            | ACE inhibitor  | 1 | LQ  | [10-11] |
|                   | 8326  | Glucose uptake stimulating peptide                       | stimulating    | 1 | LL  | [9-10]  |
|                   | 9955  | Regulator of phosphoglycerate kinase activity            | regulating     | 1 | SL  | [8-9]   |
| TNAENEFVTIK       | 9942  | ACE inhibitor                                            | ACE inhibitor  | 1 | EF  | [6-7]   |
|                   | 9580  | Hypolipidemic peptide                                    | hypolipidemic  | 1 | EF  | [6-7]   |
| IITHPNFNGNTLDNDIM | 7624  | ACE inhibitor                                            | ACE inhibitor  | 1 | NG  | [8-9]   |

|                                   |                    |       |                                    |                      |   |     |         |
|-----------------------------------|--------------------|-------|------------------------------------|----------------------|---|-----|---------|
|                                   |                    | 7683  | ACE inhibitor from garlic          | ACE inhibitor        | 1 | NF  | [6-7]   |
|                                   |                    | 7842  | ACE inhibitor                      | ACE inhibitor        | 1 | HP  | [4-5]   |
|                                   |                    | 8325  | Glucose uptake stimulating peptide | stimulating          | 1 | II  | [1-2]   |
|                                   |                    | 10744 | Hypouricemic peptide               | hypouricemic         | 1 | TL  | [11-12] |
|                                   | SNSAEDPFIAIH       | 7562  | ACE inhibitor from soy hydrolysate | ACE inhibitor        | 1 | IA  | [9-10]  |
|                                   |                    | 8193  | ACE inhibitor                      | ACE inhibitor        | 1 | AI  | [10-11] |
|                                   |                    | 10460 | ACE2 inhibitor                     | ACE2 inhibitor       | 1 | PF  | [7-8]   |
|                                   | KIITHPNFNGNTLDNDIM | 7624  | ACE inhibitor                      | ACE inhibitor        | 1 | NG  | [9-10]  |
|                                   |                    | 7683  | ACE inhibitor from garlic          | ACE inhibitor        | 1 | NF  | [7-8]   |
|                                   |                    | 7842  | ACE inhibitor                      | ACE inhibitor        | 1 | HP  | [5-6]   |
|                                   |                    | 8325  | Glucose uptake stimulating peptide | stimulating          | 1 | II  | [2-3]   |
|                                   |                    | 10744 | Hypouricemic peptide               | hypouricemic         | 1 | TL  | [12-13] |
|                                   | SISNSAEDPFIAIH     | 7562  | ACE inhibitor from soy hydrolysate | ACE inhibitor        | 1 | IA  | [11-12] |
|                                   |                    | 8193  | ACE inhibitor                      | ACE inhibitor        | 1 | AI  | [12-13] |
|                                   |                    | 10460 | ACE2 inhibitor                     | ACE2 inhibitor       | 1 | PF  | [9-10]  |
| <b>digest-supernatant control</b> | SISNSAEDPFIAIH     | 7562  | ACE inhibitor from soy hydrolysate | ACE inhibitor        | 1 | IA  | [11-12] |
|                                   |                    | 8193  | ACE inhibitor                      | ACE inhibitor        | 1 | AI  | [12-13] |
|                                   |                    | 10460 | ACE2 inhibitor                     | ACE2 inhibitor       | 1 | PF  | [9-10]  |
|                                   |                    | 10905 | Neprilysin inhibitor               | neprilysin inhibitor | 1 | AE  | [6-7]   |
|                                   | KIITHPNFNGNT       | 7624  | ACE inhibitor                      | ACE inhibitor        | 1 | NG  | [9-10]  |
|                                   |                    | 7683  | ACE inhibitor from garlic          | ACE inhibitor        | 1 | NF  | [7-8]   |
|                                   |                    | 7842  | ACE inhibitor                      | ACE inhibitor        | 1 | HP  | [5-6]   |
|                                   |                    | 8325  | Glucose uptake stimulating peptide | stimulating          | 1 | II  | [2-3]   |
|                                   | IITHPNFNGNT        | 7624  | ACE inhibitor                      | ACE inhibitor        | 1 | NG  | [8-9]   |
|                                   |                    | 7683  | ACE inhibitor from garlic          | ACE inhibitor        | 1 | NF  | [6-7]   |
|                                   |                    | 7842  | ACE inhibitor                      | ACE inhibitor        | 1 | HP  | [4-5]   |
|                                   |                    | 8325  | Glucose uptake stimulating peptide | stimulating          | 1 | II  | [1-2]   |
|                                   | ALVFVDNHDNQ        | 3384  | ACE inhibitor                      | ACE inhibitor        | 1 | VF  | [3-4]   |
|                                   |                    | 10024 | ACE inhibitor                      | ACE inhibitor        | 1 | LVF | [2-4]   |
|                                   |                    | 8321  | Glucose uptake stimulating peptide | stimulating          | 1 | LV  | [2-3]   |

|                                    |                    |       |                                                          |                                         |                                         |                                         |               |    |         |
|------------------------------------|--------------------|-------|----------------------------------------------------------|-----------------------------------------|-----------------------------------------|-----------------------------------------|---------------|----|---------|
|                                    | SSYPGQITGNMI       | 3666  | ACE inhibitor                                            | ACE inhibitor                           | 1                                       | YP                                      | [3-4]         |    |         |
|                                    |                    | 7610  | ACE inhibitor                                            | ACE inhibitor                           | 1                                       | GQ                                      | [5-6]         |    |         |
|                                    |                    | 7621  | ACE inhibitor                                            | ACE inhibitor                           | 1                                       | TG                                      | [8-9]         |    |         |
|                                    |                    | 7625  | ACE inhibitor                                            | ACE inhibitor                           | 1                                       | PG                                      | [4-5]         |    |         |
|                                    |                    | 7684  | ACE inhibitor from garlic                                | ACE inhibitor                           | 1                                       | SY                                      | [2-3]         |    |         |
|                                    |                    | 9066  | ACE inhibitor                                            | ACE inhibitor                           | 1                                       | YPG                                     | [3-5]         |    |         |
|                                    |                    | 3285  | Antithrombotic peptide                                   | antithrombotic                          | 1                                       | PG                                      | [4-5]         |    |         |
|                                    |                    | 2890  | neuropeptide                                             | neuropeptide                            | 1                                       | GQ                                      | [5-6]         |    |         |
|                                    |                    | 2754  | peptide regulating the stomach mucosal membrane activity | regulating                              | 1                                       | PG                                      | [4-5]         |    |         |
|                                    |                    |       | SNSAEDPFIAIH                                             | 7562                                    | ACE inhibitor from soy hydrolysate      | ACE inhibitor                           | 1             | IA | [9-10]  |
|                                    |                    |       |                                                          | 8193                                    | ACE inhibitor                           | ACE inhibitor                           | 1             | AI | [10-11] |
|                                    |                    |       |                                                          | 10460                                   | ACE2 inhibitor                          | ACE2 inhibitor                          | 1             | PF | [7-8]   |
|                                    |                    |       |                                                          | 10905                                   | Neprilysin inhibitor                    | neprilysin inhibitor                    | 1             | AE | [4-5]   |
|                                    |                    |       |                                                          | 10635                                   | Glutamate carboxypeptidase II inhibitor | glutamate carboxypeptidase II inhibitor | 1             | AE | [4-5]   |
|                                    | NSAEDPFIAIH        | 7562  | ACE inhibitor from soy hydrolysate                       | ACE inhibitor                           | 1                                       | IA                                      | [8-9]         |    |         |
|                                    |                    | 8193  | ACE inhibitor                                            | ACE inhibitor                           | 1                                       | AI                                      | [9-10]        |    |         |
|                                    |                    | 10460 | ACE2 inhibitor                                           | ACE2 inhibitor                          | 1                                       | PF                                      | [6-7]         |    |         |
|                                    |                    | 10905 | Neprilysin inhibitor                                     | neprilysin inhibitor                    | 1                                       | AE                                      | [3-4]         |    |         |
|                                    |                    | 10635 | Glutamate carboxypeptidase II inhibitor                  | glutamate carboxypeptidase II inhibitor | 1                                       | AE                                      | [3-4]         |    |         |
|                                    | SISNSAEDPFIAIHAESK | 7562  | ACE inhibitor from soy hydrolysate                       | ACE inhibitor                           | 1                                       | IA                                      | [11-12]       |    |         |
|                                    |                    | 8193  | ACE inhibitor                                            | ACE inhibitor                           | 1                                       | AI                                      | [12-13]       |    |         |
|                                    |                    | 10460 | ACE2 inhibitor                                           | ACE2 inhibitor                          | 1                                       | PF                                      | [9-10]        |    |         |
|                                    |                    | 10905 | Neprilysin inhibitor                                     | neprilysin inhibitor                    | 2                                       | AE                                      | [6-7],[15-16] |    |         |
|                                    |                    | 10808 | Alanine carboxypeptidase inhibitor                       | alanine carboxypeptidase inhibitor      | 1                                       | HA                                      | [14-15]       |    |         |
|                                    |                    | 10635 | Glutamate carboxypeptidase II inhibitor                  | glutamate carboxypeptidase II inhibitor | 2                                       | AE                                      | [6-7],[15-16] |    |         |
| <b>digest-supernatant<br/>5%LP</b> | SISNSAEDPFIAIH     | 7562  | ACE inhibitor from soy hydrolysate                       | ACE inhibitor                           | 1                                       | IA                                      | [11-12]       |    |         |
|                                    |                    | 8193  | ACE inhibitor                                            | ACE inhibitor                           | 1                                       | AI                                      | [12-13]       |    |         |
|                                    |                    | 10460 | ACE2 inhibitor                                           | ACE2 inhibitor                          | 1                                       | PF                                      | [9-10]        |    |         |
|                                    | SKAEAESLYQSK       | 3381  | ACE inhibitor                                            | ACE inhibitor                           | 1                                       | LY                                      | [8-9]         |    |         |
|                                    |                    | 7623  | ACE inhibitor                                            | ACE inhibitor                           | 1                                       | EA                                      | [4-5]         |    |         |

|                    |       |                                                                      |                   |   |     |         |
|--------------------|-------|----------------------------------------------------------------------|-------------------|---|-----|---------|
|                    | 7743  | ACE inhibitor                                                        | ACE inhibitor     | 1 | KA  | [2-3]   |
|                    | 10998 | ACE inhibitor                                                        | ACE inhibitor     | 1 | YQ  | [9-10]  |
|                    | 3066  | Immunostimulating peptide                                            | immunostimulating | 1 | EAE | [4-6]   |
|                    | 9955  | Regulator of phosphoglycerate kinase activity                        | regulating        | 1 | SL  | [7-8]   |
|                    | 7872  | peptide from soybean protein isolates: beta-conglycinin and glycinin | antioxidative     | 1 | LY  | [8-9]   |
|                    | 10993 | Antioxidative peptide                                                | antioxidative     | 1 | YQ  | [9-10]  |
| KIITHPNFNGNT       | 7624  | ACE inhibitor                                                        | ACE inhibitor     | 1 | NG  | [9-10]  |
|                    | 7683  | ACE inhibitor from garlic                                            | ACE inhibitor     | 1 | NF  | [7-8]   |
|                    | 7842  | ACE inhibitor                                                        | ACE inhibitor     | 1 | HP  | [5-6]   |
| ALVFDVNDHNQR       | 3384  | ACE inhibitor                                                        | ACE inhibitor     | 1 | VF  | [3-4]   |
|                    | 10024 | ACE inhibitor                                                        | ACE inhibitor     | 1 | LVF | [2-4]   |
| KIITHPNFNGNTLDNDIM | 7624  | ACE inhibitor                                                        | ACE inhibitor     | 1 | NG  | [9-10]  |
|                    | 7683  | ACE inhibitor from garlic                                            | ACE inhibitor     | 1 | NF  | [7-8]   |
|                    | 7842  | ACE inhibitor                                                        | ACE inhibitor     | 1 | HP  | [5-6]   |
|                    | 8325  | Glucose uptake stimulating peptide                                   | stimulating       | 1 | II  | [2-3]   |
|                    | 10744 | Hypouricemic peptide                                                 | hypouricemic      | 1 | TL  | [12-13] |
| SISNSAEDPFIAIHAESK | 7562  | ACE inhibitor from soy hydrolysate                                   | ACE inhibitor     | 1 | IA  | [11-12] |
|                    | 8193  | ACE inhibitor                                                        | ACE inhibitor     | 1 | AI  | [12-13] |
|                    | 10460 | ACE2 inhibitor                                                       | ACE2 inhibitor    | 1 | PF  | [9-10]  |
| IITHPNFNGNTLDNDIM  | 7624  | ACE inhibitor                                                        | ACE inhibitor     | 1 | NG  | [8-9]   |
|                    | 7683  | ACE inhibitor from garlic                                            | ACE inhibitor     | 1 | NF  | [6-7]   |
|                    | 7842  | ACE inhibitor                                                        | ACE inhibitor     | 1 | HP  | [4-5]   |
|                    | 10744 | Hypouricemic peptide                                                 | hypouricemic      | 1 | TL  | [11-12] |
| IITHPNFNGNTLDNDIML | 7624  | ACE inhibitor                                                        | ACE inhibitor     | 1 | NG  | [8-9]   |
|                    | 7683  | ACE inhibitor from garlic                                            | ACE inhibitor     | 1 | NF  | [6-7]   |
|                    | 7842  | ACE inhibitor                                                        | ACE inhibitor     | 1 | HP  | [4-5]   |
|                    | 10744 | Hypouricemic peptide                                                 | hypouricemic      | 1 | TL  | [11-12] |
| SNSAEDPFIAIH       | 7562  | ACE inhibitor from soy hydrolysate                                   | ACE inhibitor     | 1 | IA  | [9-10]  |
|                    | 8193  | ACE inhibitor                                                        | ACE inhibitor     | 1 | AI  | [10-11] |
|                    | 10460 | ACE2 inhibitor                                                       | ACE2 inhibitor    | 1 | PF  | [7-8]   |

|                    |       |                                    |                |   |    |             |
|--------------------|-------|------------------------------------|----------------|---|----|-------------|
| NWGEGWGFMPSTR      | 7579  | ACE inhibitor                      | ACE inhibitor  | 1 | GW | [5-6]       |
|                    | 7591  | ACE inhibitor                      | ACE inhibitor  | 1 | GF | [7-8]       |
|                    | 7613  | ACE inhibitor                      | ACE inhibitor  | 2 | WG | [2-3],[6-7] |
|                    | 7615  | ACE inhibitor                      | ACE inhibitor  | 1 | GE | [3-4]       |
|                    | 7622  | ACE inhibitor                      | ACE inhibitor  | 1 | EG | [4-5]       |
|                    | 10091 | ACE inhibitor                      | ACE inhibitor  | 1 | DR | [12-13]     |
|                    | 10795 | Neuropeptide                       | neuropeptide   | 1 | EG | [4-5]       |
|                    | 9082  | Antioxidative peptide              | antioxidative  | 2 | WG | [2-3],[6-7] |
|                    | 10472 | Antioxidative peptide              | antioxidative  | 1 | GW | [5-6]       |
|                    | 10794 | Calcium binding peptide            | binding        | 1 | EG | [4-5]       |
| SISNSAEDPFIAIHA    | 7562  | ACE inhibitor from soy hydrolysate | ACE inhibitor  | 1 | IA | [11-12]     |
|                    | 8193  | ACE inhibitor                      | ACE inhibitor  | 1 | AI | [12-13]     |
|                    | 10460 | ACE2 inhibitor                     | ACE2 inhibitor | 1 | PF | [9-10]      |
| AEDPFIAIHAESK      | 7562  | ACE inhibitor from soy hydrolysate | ACE inhibitor  | 1 | IA | [6-7]       |
|                    | 8193  | ACE inhibitor                      | ACE inhibitor  | 1 | AI | [7-8]       |
|                    | 10460 | ACE2 inhibitor                     | ACE2 inhibitor | 1 | PF | [4-5]       |
| SAEDPFIAIHAESK     | 7562  | ACE inhibitor from soy hydrolysate | ACE inhibitor  | 1 | IA | [7-8]       |
|                    | 8193  | ACE inhibitor                      | ACE inhibitor  | 1 | AI | [8-9]       |
|                    | 10460 | ACE2 inhibitor                     | ACE2 inhibitor | 1 | PF | [5-6]       |
| ISNSAEDPFIAIHAESK  | 7562  | ACE inhibitor from soy hydrolysate | ACE inhibitor  | 1 | IA | [10-11]     |
|                    | 8193  | ACE inhibitor                      | ACE inhibitor  | 1 | AI | [11-12]     |
|                    | 10460 | ACE2 inhibitor                     | ACE2 inhibitor | 1 | PF | [8-9]       |
| EDPFIAIHAESK       | 7562  | ACE inhibitor from soy hydrolysate | ACE inhibitor  | 1 | IA | [5-6]       |
|                    | 8193  | ACE inhibitor                      | ACE inhibitor  | 1 | AI | [6-7]       |
|                    | 10460 | ACE2 inhibitor                     | ACE2 inhibitor | 1 | PF | [3-4]       |
| LGEHNIDVLEGNQFINAA | 7590  | ACE inhibitor                      | ACE inhibitor  | 1 | AA | [18-19]     |
|                    | 7615  | ACE inhibitor                      | ACE inhibitor  | 1 | GE | [2-3]       |
|                    | 7619  | ACE inhibitor                      | ACE inhibitor  | 1 | LG | [1-2]       |
|                    | 7622  | ACE inhibitor                      | ACE inhibitor  | 1 | EG | [10-11]     |
|                    | 10663 | Antibacterial peptide              | antibacterial  | 1 | AA | [18-19]     |

|                      |       |                                    |                |   |    |             |
|----------------------|-------|------------------------------------|----------------|---|----|-------------|
| LGEHNIDVLEGNEQFINAAK | 8320  | Glucose uptake stimulating peptide | stimulating    | 1 | VL | [8-9]       |
|                      | 10795 | Neuropeptide                       | neuropeptide   | 1 | EG | [10-11]     |
|                      | 10794 | Calcium binding peptide            | binding        | 1 | EG | [10-11]     |
|                      | 10141 | Hypotensive peptide                | hypotensive    | 1 | AA | [18-19]     |
|                      | 7590  | ACE inhibitor                      | ACE inhibitor  | 1 | AA | [18-19]     |
|                      | 7615  | ACE inhibitor                      | ACE inhibitor  | 1 | GE | [2-3]       |
|                      | 7619  | ACE inhibitor                      | ACE inhibitor  | 1 | LG | [1-2]       |
|                      | 7622  | ACE inhibitor                      | ACE inhibitor  | 1 | EG | [10-11]     |
|                      | 10920 | ACE inhibitor                      | ACE inhibitor  | 1 | AK | [19-20]     |
|                      | 10663 | Antibacterial peptide              | antibacterial  | 1 | AA | [18-19]     |
| IITHPNFNGNTLDNDIMLIK | 8320  | Glucose uptake stimulating peptide | stimulating    | 1 | VL | [8-9]       |
|                      | 10795 | Neuropeptide                       | neuropeptide   | 1 | EG | [10-11]     |
|                      | 10794 | Calcium binding peptide            | binding        | 1 | EG | [10-11]     |
|                      | 10141 | Hypotensive peptide                | hypotensive    | 1 | AA | [18-19]     |
|                      | 7624  | ACE inhibitor                      | ACE inhibitor  | 1 | NG | [8-9]       |
|                      | 7683  | ACE inhibitor from garlic          | ACE inhibitor  | 1 | NF | [6-7]       |
|                      | 7842  | ACE inhibitor                      | ACE inhibitor  | 1 | HP | [4-5]       |
|                      | 8324  | Glucose uptake stimulating peptide | stimulating    | 1 | LI | [18-19]     |
|                      | 8325  | Glucose uptake stimulating peptide | stimulating    | 1 | II | [1-2]       |
|                      | 10744 | Hypouricemic peptide               | hypouricemic   | 1 | TL | [11-12]     |
| SISNSAEDPFIAIHAESKL  | 7562  | ACE inhibitor from soy hydrolysate | ACE inhibitor  | 1 | IA | [11-12]     |
|                      | 8193  | ACE inhibitor                      | ACE inhibitor  | 1 | AI | [12-13]     |
|                      | 7693  | ACE inhibitor from wakame          | ACE inhibitor  | 1 | KL | [18-19]     |
|                      | 10460 | ACE2 inhibitor                     | ACE2 inhibitor | 1 | PF | [9-10]      |
| WGEGWGFMPSTR         | 7579  | ACE inhibitor                      | ACE inhibitor  | 1 | GW | [4-5]       |
|                      | 7591  | ACE inhibitor                      | ACE inhibitor  | 1 | GF | [6-7]       |
|                      | 7613  | ACE inhibitor                      | ACE inhibitor  | 2 | WG | [1-2],[5-6] |
|                      | 7615  | ACE inhibitor                      | ACE inhibitor  | 1 | GE | [2-3]       |
|                      | 7622  | ACE inhibitor                      | ACE inhibitor  | 1 | EG | [3-4]       |
|                      | 10091 | ACE inhibitor                      | ACE inhibitor  | 1 | DR | [11-12]     |

|                                    |                                                      |                                                      |                                                      |                                   |         |        |             |
|------------------------------------|------------------------------------------------------|------------------------------------------------------|------------------------------------------------------|-----------------------------------|---------|--------|-------------|
|                                    |                                                      | 10795                                                | Neuropeptide                                         | neuropeptide                      | 1       | EG     | [3-4]       |
|                                    |                                                      | 9082                                                 | Antioxidative peptide                                | antioxidative                     | 2       | WG     | [1-2],[5-6] |
|                                    |                                                      | 10472                                                | Antioxidative peptide                                | antioxidative                     | 1       | GW     | [4-5]       |
|                                    |                                                      | 10794                                                | Calcium binding peptide                              | binding                           | 1       | EG     | [3-4]       |
| <b>digest-supernatant<br/>5%LC</b> | KIITHPNFNGN                                          | 7624                                                 | ACE inhibitor                                        | ACE inhibitor                     | 1       | NG     | [9-10]      |
|                                    |                                                      | 7683                                                 | ACE inhibitor from garlic                            | ACE inhibitor                     | 1       | NF     | [7-8]       |
|                                    |                                                      | 7842                                                 | ACE inhibitor                                        | ACE inhibitor                     | 1       | HP     | [5-6]       |
|                                    |                                                      | 8325                                                 | Glucose uptake stimulating peptide                   | stimulating                       | 1       | II     | [2-3]       |
|                                    |                                                      | 8520                                                 | dipeptidyl peptidase IV inhibitor (DPP IV inhibitor) | dipeptidyl peptidase IV inhibitor | 1       | HP     | [5-6]       |
|                                    |                                                      | 8778                                                 | dipeptidyl peptidase IV inhibitor (DPP IV inhibitor) | dipeptidyl peptidase IV inhibitor | 1       | FN     | [8-9]       |
|                                    |                                                      | 8801                                                 | dipeptidyl peptidase IV inhibitor (DPP IV inhibitor) | dipeptidyl peptidase IV inhibitor | 1       | II     | [2-3]       |
|                                    |                                                      | 8812                                                 | dipeptidyl peptidase IV inhibitor (DPP IV inhibitor) | dipeptidyl peptidase IV inhibitor | 1       | KI     | [1-2]       |
|                                    |                                                      | 8842                                                 | dipeptidyl peptidase IV inhibitor (DPP IV inhibitor) | dipeptidyl peptidase IV inhibitor | 1       | NF     | [7-8]       |
|                                    |                                                      | 8843                                                 | dipeptidyl peptidase IV inhibitor (DPP IV inhibitor) | dipeptidyl peptidase IV inhibitor | 1       | NG     | [9-10]      |
|                                    | 8860                                                 | dipeptidyl peptidase IV inhibitor (DPP IV inhibitor) | dipeptidyl peptidase IV inhibitor                    | 1                                 | PN      | [6-7]  |             |
|                                    | 8902                                                 | dipeptidyl peptidase IV inhibitor (DPP IV inhibitor) | dipeptidyl peptidase IV inhibitor                    | 1                                 | TH      | [4-5]  |             |
|                                    | 9496                                                 | DPP-III inhibitor                                    | dipeptidyl peptidase III inhibitor                   | 1                                 | HP      | [5-6]  |             |
|                                    | KIITHPNFNGNT                                         | 7624                                                 | ACE inhibitor                                        | ACE inhibitor                     | 1       | NG     | [9-10]      |
|                                    |                                                      | 7683                                                 | ACE inhibitor from garlic                            | ACE inhibitor                     | 1       | NF     | [7-8]       |
|                                    |                                                      | 7842                                                 | ACE inhibitor                                        | ACE inhibitor                     | 1       | HP     | [5-6]       |
|                                    |                                                      | 8325                                                 | Glucose uptake stimulating peptide                   | stimulating                       | 1       | II     | [2-3]       |
|                                    |                                                      | 8520                                                 | dipeptidyl peptidase IV inhibitor (DPP IV inhibitor) | dipeptidyl peptidase IV inhibitor | 1       | HP     | [5-6]       |
|                                    |                                                      | 8778                                                 | dipeptidyl peptidase IV inhibitor (DPP IV inhibitor) | dipeptidyl peptidase IV inhibitor | 1       | FN     | [8-9]       |
|                                    |                                                      | 8801                                                 | dipeptidyl peptidase IV inhibitor (DPP IV inhibitor) | dipeptidyl peptidase IV inhibitor | 1       | II     | [2-3]       |
| 8812                               |                                                      | dipeptidyl peptidase IV inhibitor (DPP IV inhibitor) | dipeptidyl peptidase IV inhibitor                    | 1                                 | KI      | [1-2]  |             |
| 8842                               |                                                      | dipeptidyl peptidase IV inhibitor (DPP IV inhibitor) | dipeptidyl peptidase IV inhibitor                    | 1                                 | NF      | [7-8]  |             |
| 8843                               |                                                      | dipeptidyl peptidase IV inhibitor (DPP IV inhibitor) | dipeptidyl peptidase IV inhibitor                    | 1                                 | NG      | [9-10] |             |
| 8850                               | dipeptidyl peptidase IV inhibitor (DPP IV inhibitor) | dipeptidyl peptidase IV inhibitor                    | 1                                                    | NT                                | [11-12] |        |             |
| 8860                               | dipeptidyl peptidase IV inhibitor (DPP IV inhibitor) | dipeptidyl peptidase IV inhibitor                    | 1                                                    | PN                                | [6-7]   |        |             |
| 8902                               | dipeptidyl peptidase IV inhibitor (DPP IV inhibitor) | dipeptidyl peptidase IV inhibitor                    | 1                                                    | TH                                | [4-5]   |        |             |

|                |       |                                                      |                                       |   |     |              |
|----------------|-------|------------------------------------------------------|---------------------------------------|---|-----|--------------|
|                | 9496  | DPP-III inhibitor                                    | dipeptidyl peptidase III inhibitor    | 1 | HP  | [5-6]        |
| ALVFVDNHDNQR   | 3384  | ACE inhibitor                                        | ACE inhibitor                         | 1 | VF  | [3-4]        |
|                | 10024 | ACE inhibitor                                        | ACE inhibitor                         | 1 | LVF | [2-4]        |
|                | 8321  | Glucose uptake stimulating peptide                   | stimulating                           | 1 | LV  | [2-3]        |
|                | 8559  | dipeptidyl peptidase IV inhibitor (DPP IV inhibitor) | dipeptidyl peptidase IV inhibitor     | 1 | AL  | [1-2]        |
|                | 8766  | dipeptidyl peptidase IV inhibitor (DPP IV inhibitor) | dipeptidyl peptidase IV inhibitor     | 2 | DN  | [6-7],[9-10] |
|                | 8789  | dipeptidyl peptidase IV inhibitor (DPP IV inhibitor) | dipeptidyl peptidase IV inhibitor     | 1 | HD  | [8-9]        |
|                | 8825  | dipeptidyl peptidase IV inhibitor (DPP IV inhibitor) | dipeptidyl peptidase IV inhibitor     | 1 | LV  | [2-3]        |
|                | 8844  | dipeptidyl peptidase IV inhibitor (DPP IV inhibitor) | dipeptidyl peptidase IV inhibitor     | 1 | NH  | [7-8]        |
|                | 8848  | dipeptidyl peptidase IV inhibitor (DPP IV inhibitor) | dipeptidyl peptidase IV inhibitor     | 1 | NQ  | [10-11]      |
|                | 8915  | dipeptidyl peptidase IV inhibitor (DPP IV inhibitor) | dipeptidyl peptidase IV inhibitor     | 1 | VD  | [5-6]        |
|                | 8917  | dipeptidyl peptidase IV inhibitor (DPP IV inhibitor) | dipeptidyl peptidase IV inhibitor     | 1 | VF  | [3-4]        |
|                | 9918  | Calpain 1 inhibitor                                  | calpain 1 inhibitor                   | 1 | VF  | [3-4]        |
|                | 9920  | Inhibitor of tripeptidyl peptidase II                | inhibitor of tripeptidyl peptidase II | 1 | VF  | [3-4]        |
|                | 10095 | Inhibitor of neprilysin-2                            | neprilysin 2 inhibitor                | 1 | VF  | [3-4]        |
| ALVFVDNHDNQ    | 3384  | ACE inhibitor                                        | ACE inhibitor                         | 1 | VF  | [3-4]        |
|                | 10024 | ACE inhibitor                                        | ACE inhibitor                         | 1 | LVF | [2-4]        |
|                | 8321  | Glucose uptake stimulating peptide                   | stimulating                           | 1 | LV  | [2-3]        |
|                | 8559  | dipeptidyl peptidase IV inhibitor (DPP IV inhibitor) | dipeptidyl peptidase IV inhibitor     | 1 | AL  | [1-2]        |
|                | 8766  | dipeptidyl peptidase IV inhibitor (DPP IV inhibitor) | dipeptidyl peptidase IV inhibitor     | 2 | DN  | [6-7],[9-10] |
|                | 8789  | dipeptidyl peptidase IV inhibitor (DPP IV inhibitor) | dipeptidyl peptidase IV inhibitor     | 1 | HD  | [8-9]        |
|                | 8825  | dipeptidyl peptidase IV inhibitor (DPP IV inhibitor) | dipeptidyl peptidase IV inhibitor     | 1 | LV  | [2-3]        |
|                | 8844  | dipeptidyl peptidase IV inhibitor (DPP IV inhibitor) | dipeptidyl peptidase IV inhibitor     | 1 | NH  | [7-8]        |
|                | 8848  | dipeptidyl peptidase IV inhibitor (DPP IV inhibitor) | dipeptidyl peptidase IV inhibitor     | 1 | NQ  | [10-11]      |
|                | 8915  | dipeptidyl peptidase IV inhibitor (DPP IV inhibitor) | dipeptidyl peptidase IV inhibitor     | 1 | VD  | [5-6]        |
|                | 8917  | dipeptidyl peptidase IV inhibitor (DPP IV inhibitor) | dipeptidyl peptidase IV inhibitor     | 1 | VF  | [3-4]        |
|                | 9918  | Calpain 1 inhibitor                                  | calpain 1 inhibitor                   | 1 | VF  | [3-4]        |
|                | 9920  | Inhibitor of tripeptidyl peptidase II                | inhibitor of tripeptidyl peptidase II | 1 | VF  | [3-4]        |
|                | 10095 | Inhibitor of neprilysin-2                            | neprilysin 2 inhibitor                | 1 | VF  | [3-4]        |
| LGEHNIDVLEGNEQ | 7615  | ACE inhibitor                                        | ACE inhibitor                         | 1 | GE  | [2-3]        |

|                |       |                                                      |                                         |   |    |               |
|----------------|-------|------------------------------------------------------|-----------------------------------------|---|----|---------------|
|                | 7619  | ACE inhibitor                                        | ACE inhibitor                           | 1 | LG | [1-2]         |
|                | 7622  | ACE inhibitor                                        | ACE inhibitor                           | 1 | EG | [10-11]       |
|                | 8320  | Glucose uptake stimulating peptide                   | stimulating                             | 1 | VL | [8-9]         |
|                | 10795 | Neuropeptide                                         | neuropeptide                            | 1 | EG | [10-11]       |
|                | 10794 | Calcium binding peptide                              | binding                                 | 1 | EG | [10-11]       |
|                | 8770  | dipeptidyl peptidase IV inhibitor (DPP IV inhibitor) | dipeptidyl peptidase IV inhibitor       | 1 | EG | [10-11]       |
|                | 8771  | dipeptidyl peptidase IV inhibitor (DPP IV inhibitor) | dipeptidyl peptidase IV inhibitor       | 1 | EH | [3-4]         |
|                | 8781  | dipeptidyl peptidase IV inhibitor (DPP IV inhibitor) | dipeptidyl peptidase IV inhibitor       | 1 | GE | [2-3]         |
|                | 8841  | dipeptidyl peptidase IV inhibitor (DPP IV inhibitor) | dipeptidyl peptidase IV inhibitor       | 1 | NE | [12-13]       |
|                | 8922  | dipeptidyl peptidase IV inhibitor (DPP IV inhibitor) | dipeptidyl peptidase IV inhibitor       | 1 | VL | [8-9]         |
|                | 9487  | DPP-III inhibitor                                    | dipeptidyl peptidase III inhibitor      | 1 | GE | [2-3]         |
|                | 10911 | Neprilysin inhibitor                                 | neprilysin inhibitor                    | 1 | GE | [2-3]         |
|                | 10623 | Glutamate carboxypeptidase inhibitor                 | glutamate carboxypeptidase inhibitor    | 1 | GE | [2-3]         |
|                | 10654 | Glutamate carboxypeptidase II inhibitor              | glutamate carboxypeptidase II inhibitor | 1 | GE | [2-3]         |
| SAEDPFIAIHAESK | 7562  | ACE inhibitor from soy hydrolysate                   | ACE inhibitor                           | 1 | IA | [7-8]         |
|                | 8193  | ACE inhibitor                                        | ACE inhibitor                           | 1 | AI | [8-9]         |
|                | 3184  | dipeptidyl peptidase IV inhibitor (DPP IV inhibitor) | dipeptidyl peptidase IV inhibitor       | 1 | HA | [10-11]       |
|                | 8525  | dipeptidyl peptidase IV inhibitor (DPP IV inhibitor) | dipeptidyl peptidase IV inhibitor       | 1 | IA | [7-8]         |
|                | 8758  | dipeptidyl peptidase IV inhibitor (DPP IV inhibitor) | dipeptidyl peptidase IV inhibitor       | 2 | AE | [2-3],[11-12] |
|                | 8767  | dipeptidyl peptidase IV inhibitor (DPP IV inhibitor) | dipeptidyl peptidase IV inhibitor       | 1 | DP | [4-5]         |
|                | 8773  | dipeptidyl peptidase IV inhibitor (DPP IV inhibitor) | dipeptidyl peptidase IV inhibitor       | 1 | ES | [12-13]       |
|                | 8800  | dipeptidyl peptidase IV inhibitor (DPP IV inhibitor) | dipeptidyl peptidase IV inhibitor       | 1 | IH | [9-10]        |
|                | 8854  | dipeptidyl peptidase IV inhibitor (DPP IV inhibitor) | dipeptidyl peptidase IV inhibitor       | 1 | PF | [5-6]         |
|                | 8894  | dipeptidyl peptidase IV inhibitor (DPP IV inhibitor) | dipeptidyl peptidase IV inhibitor       | 1 | SK | [13-14]       |
|                | 9497  | DPP-III inhibitor                                    | dipeptidyl peptidase III inhibitor      | 1 | IH | [9-10]        |
|                | 9505  | DPP-III inhibitor                                    | dipeptidyl peptidase III inhibitor      | 1 | PF | [5-6]         |
|                | 10460 | ACE2 inhibitor                                       | ACE2 inhibitor                          | 1 | PF | [5-6]         |
|                | 10905 | Neprilysin inhibitor                                 | neprilysin inhibitor                    | 2 | AE | [2-3],[11-12] |
|                | 10808 | Alanine carboxypeptidase inhibitor                   | alanine carboxypeptidase inhibitor      | 1 | HA | [10-11]       |
|                | 10635 | Glutamate carboxypeptidase II inhibitor              | glutamate carboxypeptidase II inhibitor | 2 | AE | [2-3],[11-12] |

|                    |                      |                                                      |                                    |    |         |               |
|--------------------|----------------------|------------------------------------------------------|------------------------------------|----|---------|---------------|
| KIITHPNFNGNTLDNDIM | 7624                 | ACE inhibitor                                        | ACE inhibitor                      | 1  | NG      | [9-10]        |
|                    | 7683                 | ACE inhibitor from garlic                            | ACE inhibitor                      | 1  | NF      | [7-8]         |
|                    | 7842                 | ACE inhibitor                                        | ACE inhibitor                      | 1  | HP      | [5-6]         |
|                    | 8325                 | Glucose uptake stimulating peptide                   | stimulating                        | 1  | II      | [2-3]         |
|                    | 8520                 | dipeptidyl peptidase IV inhibitor (DPP IV inhibitor) | dipeptidyl peptidase IV inhibitor  | 1  | HP      | [5-6]         |
|                    | 8766                 | dipeptidyl peptidase IV inhibitor (DPP IV inhibitor) | dipeptidyl peptidase IV inhibitor  | 1  | DN      | [14-15]       |
|                    | 8778                 | dipeptidyl peptidase IV inhibitor (DPP IV inhibitor) | dipeptidyl peptidase IV inhibitor  | 1  | FN      | [8-9]         |
|                    | 8801                 | dipeptidyl peptidase IV inhibitor (DPP IV inhibitor) | dipeptidyl peptidase IV inhibitor  | 1  | II      | [2-3]         |
|                    | 8803                 | dipeptidyl peptidase IV inhibitor (DPP IV inhibitor) | dipeptidyl peptidase IV inhibitor  | 1  | IM      | [17-18]       |
|                    | 8812                 | dipeptidyl peptidase IV inhibitor (DPP IV inhibitor) | dipeptidyl peptidase IV inhibitor  | 1  | KI      | [1-2]         |
|                    | 8840                 | dipeptidyl peptidase IV inhibitor (DPP IV inhibitor) | dipeptidyl peptidase IV inhibitor  | 1  | ND      | [15-16]       |
|                    | 8842                 | dipeptidyl peptidase IV inhibitor (DPP IV inhibitor) | dipeptidyl peptidase IV inhibitor  | 1  | NF      | [7-8]         |
|                    | 8843                 | dipeptidyl peptidase IV inhibitor (DPP IV inhibitor) | dipeptidyl peptidase IV inhibitor  | 1  | NG      | [9-10]        |
|                    | 8850                 | dipeptidyl peptidase IV inhibitor (DPP IV inhibitor) | dipeptidyl peptidase IV inhibitor  | 1  | NT      | [11-12]       |
|                    | 8860                 | dipeptidyl peptidase IV inhibitor (DPP IV inhibitor) | dipeptidyl peptidase IV inhibitor  | 1  | PN      | [6-7]         |
|                    | 8902                 | dipeptidyl peptidase IV inhibitor (DPP IV inhibitor) | dipeptidyl peptidase IV inhibitor  | 1  | TH      | [4-5]         |
|                    | 8905                 | dipeptidyl peptidase IV inhibitor (DPP IV inhibitor) | dipeptidyl peptidase IV inhibitor  | 1  | TL      | [12-13]       |
| 9496               | DPP-III inhibitor    | dipeptidyl peptidase III inhibitor                   | 1                                  | HP | [5-6]   |               |
| 10744              | Hypouricemic peptide | hypouricemic                                         | 1                                  | TL | [12-13] |               |
| ISNSAEDPFIAIHAESK  | 7562                 | ACE inhibitor from soy hydrolysate                   | ACE inhibitor                      | 1  | IA      | [10-11]       |
|                    | 8193                 | ACE inhibitor                                        | ACE inhibitor                      | 1  | AI      | [11-12]       |
|                    | 3184                 | dipeptidyl peptidase IV inhibitor (DPP IV inhibitor) | dipeptidyl peptidase IV inhibitor  | 1  | HA      | [13-14]       |
|                    | 8525                 | dipeptidyl peptidase IV inhibitor (DPP IV inhibitor) | dipeptidyl peptidase IV inhibitor  | 1  | IA      | [10-11]       |
|                    | 8758                 | dipeptidyl peptidase IV inhibitor (DPP IV inhibitor) | dipeptidyl peptidase IV inhibitor  | 2  | AE      | [5-6],[14-15] |
|                    | 8767                 | dipeptidyl peptidase IV inhibitor (DPP IV inhibitor) | dipeptidyl peptidase IV inhibitor  | 1  | DP      | [7-8]         |
|                    | 8773                 | dipeptidyl peptidase IV inhibitor (DPP IV inhibitor) | dipeptidyl peptidase IV inhibitor  | 1  | ES      | [15-16]       |
|                    | 8800                 | dipeptidyl peptidase IV inhibitor (DPP IV inhibitor) | dipeptidyl peptidase IV inhibitor  | 1  | IH      | [12-13]       |
|                    | 8854                 | dipeptidyl peptidase IV inhibitor (DPP IV inhibitor) | dipeptidyl peptidase IV inhibitor  | 1  | PF      | [8-9]         |
|                    | 8894                 | dipeptidyl peptidase IV inhibitor (DPP IV inhibitor) | dipeptidyl peptidase IV inhibitor  | 1  | SK      | [16-17]       |
|                    | 9497                 | DPP-III inhibitor                                    | dipeptidyl peptidase III inhibitor | 1  | IH      | [12-13]       |

|                    |               |                                                      |                                         |                                    |    |               |        |
|--------------------|---------------|------------------------------------------------------|-----------------------------------------|------------------------------------|----|---------------|--------|
| SISNSAEDPFIAIHAESK | 9505          | DPP-III inhibitor                                    | dipeptidyl peptidase III inhibitor      | 1                                  | PF | [8-9]         |        |
|                    | 10460         | ACE2 inhibitor                                       | ACE2 inhibitor                          | 1                                  | PF | [8-9]         |        |
|                    | 10905         | Neprilysin inhibitor                                 | neprilysin inhibitor                    | 2                                  | AE | [5-6],[14-15] |        |
|                    | 10808         | Alanine carboxypeptidase inhibitor                   | alanine carboxypeptidase inhibitor      | 1                                  | HA | [13-14]       |        |
|                    | 10635         | Glutamate carboxypeptidase II inhibitor              | glutamate carboxypeptidase II inhibitor | 2                                  | AE | [5-6],[14-15] |        |
|                    | 7562          | ACE inhibitor from soy hydrolysate                   | ACE inhibitor                           | 1                                  | IA | [11-12]       |        |
|                    | 8193          | ACE inhibitor                                        | ACE inhibitor                           | 1                                  | AI | [12-13]       |        |
|                    | 3184          | dipeptidyl peptidase IV inhibitor (DPP IV inhibitor) | dipeptidyl peptidase IV inhibitor       | 1                                  | HA | [14-15]       |        |
|                    | 8525          | dipeptidyl peptidase IV inhibitor (DPP IV inhibitor) | dipeptidyl peptidase IV inhibitor       | 1                                  | IA | [11-12]       |        |
|                    | 8758          | dipeptidyl peptidase IV inhibitor (DPP IV inhibitor) | dipeptidyl peptidase IV inhibitor       | 2                                  | AE | [6-7],[15-16] |        |
|                    | 8767          | dipeptidyl peptidase IV inhibitor (DPP IV inhibitor) | dipeptidyl peptidase IV inhibitor       | 1                                  | DP | [8-9]         |        |
|                    | 8773          | dipeptidyl peptidase IV inhibitor (DPP IV inhibitor) | dipeptidyl peptidase IV inhibitor       | 1                                  | ES | [16-17]       |        |
|                    | 8800          | dipeptidyl peptidase IV inhibitor (DPP IV inhibitor) | dipeptidyl peptidase IV inhibitor       | 1                                  | IH | [13-14]       |        |
|                    | 8854          | dipeptidyl peptidase IV inhibitor (DPP IV inhibitor) | dipeptidyl peptidase IV inhibitor       | 1                                  | PF | [9-10]        |        |
|                    | 8893          | dipeptidyl peptidase IV inhibitor (DPP IV inhibitor) | dipeptidyl peptidase IV inhibitor       | 1                                  | SI | [1-2]         |        |
|                    | 8894          | dipeptidyl peptidase IV inhibitor (DPP IV inhibitor) | dipeptidyl peptidase IV inhibitor       | 1                                  | SK | [17-18]       |        |
|                    | 9497          | DPP-III inhibitor                                    | dipeptidyl peptidase III inhibitor      | 1                                  | IH | [13-14]       |        |
|                    | AEDPFIAIHAESK | 9505                                                 | DPP-III inhibitor                       | dipeptidyl peptidase III inhibitor | 1  | PF            | [9-10] |
|                    |               | 10460                                                | ACE2 inhibitor                          | ACE2 inhibitor                     | 1  | PF            | [9-10] |
| 10905              |               | Neprilysin inhibitor                                 | neprilysin inhibitor                    | 2                                  | AE | [6-7],[15-16] |        |
| 10808              |               | Alanine carboxypeptidase inhibitor                   | alanine carboxypeptidase inhibitor      | 1                                  | HA | [14-15]       |        |
| 10635              |               | Glutamate carboxypeptidase II inhibitor              | glutamate carboxypeptidase II inhibitor | 2                                  | AE | [6-7],[15-16] |        |
| 7562               |               | ACE inhibitor from soy hydrolysate                   | ACE inhibitor                           | 1                                  | IA | [6-7]         |        |
| 8193               |               | ACE inhibitor                                        | ACE inhibitor                           | 1                                  | AI | [7-8]         |        |
| 3184               |               | dipeptidyl peptidase IV inhibitor (DPP IV inhibitor) | dipeptidyl peptidase IV inhibitor       | 1                                  | HA | [9-10]        |        |
| 8525               |               | dipeptidyl peptidase IV inhibitor (DPP IV inhibitor) | dipeptidyl peptidase IV inhibitor       | 1                                  | IA | [6-7]         |        |
| 8758               |               | dipeptidyl peptidase IV inhibitor (DPP IV inhibitor) | dipeptidyl peptidase IV inhibitor       | 2                                  | AE | [1-2],[10-11] |        |
| 8767               |               | dipeptidyl peptidase IV inhibitor (DPP IV inhibitor) | dipeptidyl peptidase IV inhibitor       | 1                                  | DP | [3-4]         |        |
| 8773               |               | dipeptidyl peptidase IV inhibitor (DPP IV inhibitor) | dipeptidyl peptidase IV inhibitor       | 1                                  | ES | [11-12]       |        |
| 8800               |               | dipeptidyl peptidase IV inhibitor (DPP IV inhibitor) | dipeptidyl peptidase IV inhibitor       | 1                                  | IH | [8-9]         |        |

|                   |                    |                                                      |                                         |               |    |               |       |
|-------------------|--------------------|------------------------------------------------------|-----------------------------------------|---------------|----|---------------|-------|
| IITHPNFNGNTLDNDIM | 8854               | dipeptidyl peptidase IV inhibitor (DPP IV inhibitor) | dipeptidyl peptidase IV inhibitor       | 1             | PF | [4-5]         |       |
|                   | 8894               | dipeptidyl peptidase IV inhibitor (DPP IV inhibitor) | dipeptidyl peptidase IV inhibitor       | 1             | SK | [12-13]       |       |
|                   | 9497               | DPP-III inhibitor                                    | dipeptidyl peptidase III inhibitor      | 1             | IH | [8-9]         |       |
|                   | 9505               | DPP-III inhibitor                                    | dipeptidyl peptidase III inhibitor      | 1             | PF | [4-5]         |       |
|                   | 10460              | ACE2 inhibitor                                       | ACE2 inhibitor                          | 1             | PF | [4-5]         |       |
|                   | 10905              | Neprilysin inhibitor                                 | neprilysin inhibitor                    | 2             | AE | [1-2],[10-11] |       |
|                   | 10808              | Alanine carboxypeptidase inhibitor                   | alanine carboxypeptidase inhibitor      | 1             | HA | [9-10]        |       |
|                   | 10635              | Glutamate carboxypeptidase II inhibitor              | glutamate carboxypeptidase II inhibitor | 2             | AE | [1-2],[10-11] |       |
|                   | 7624               | ACE inhibitor                                        | ACE inhibitor                           | 1             | NG | [8-9]         |       |
|                   | 7683               | ACE inhibitor from garlic                            | ACE inhibitor                           | 1             | NF | [6-7]         |       |
|                   | 7842               | ACE inhibitor                                        | ACE inhibitor                           | 1             | HP | [4-5]         |       |
|                   | 8325               | Glucose uptake stimulating peptide                   | stimulating                             | 1             | II | [1-2]         |       |
|                   | 8520               | dipeptidyl peptidase IV inhibitor (DPP IV inhibitor) | dipeptidyl peptidase IV inhibitor       | 1             | HP | [4-5]         |       |
|                   | 8766               | dipeptidyl peptidase IV inhibitor (DPP IV inhibitor) | dipeptidyl peptidase IV inhibitor       | 1             | DN | [13-14]       |       |
|                   | 8778               | dipeptidyl peptidase IV inhibitor (DPP IV inhibitor) | dipeptidyl peptidase IV inhibitor       | 1             | FN | [7-8]         |       |
|                   | 8801               | dipeptidyl peptidase IV inhibitor (DPP IV inhibitor) | dipeptidyl peptidase IV inhibitor       | 1             | II | [1-2]         |       |
|                   | 8803               | dipeptidyl peptidase IV inhibitor (DPP IV inhibitor) | dipeptidyl peptidase IV inhibitor       | 1             | IM | [16-17]       |       |
|                   | 8840               | dipeptidyl peptidase IV inhibitor (DPP IV inhibitor) | dipeptidyl peptidase IV inhibitor       | 1             | ND | [14-15]       |       |
|                   | 8842               | dipeptidyl peptidase IV inhibitor (DPP IV inhibitor) | dipeptidyl peptidase IV inhibitor       | 1             | NF | [6-7]         |       |
|                   | 8843               | dipeptidyl peptidase IV inhibitor (DPP IV inhibitor) | dipeptidyl peptidase IV inhibitor       | 1             | NG | [8-9]         |       |
|                   | 8850               | dipeptidyl peptidase IV inhibitor (DPP IV inhibitor) | dipeptidyl peptidase IV inhibitor       | 1             | NT | [10-11]       |       |
|                   | 8860               | dipeptidyl peptidase IV inhibitor (DPP IV inhibitor) | dipeptidyl peptidase IV inhibitor       | 1             | PN | [5-6]         |       |
|                   | 8902               | dipeptidyl peptidase IV inhibitor (DPP IV inhibitor) | dipeptidyl peptidase IV inhibitor       | 1             | TH | [3-4]         |       |
|                   | 8905               | dipeptidyl peptidase IV inhibitor (DPP IV inhibitor) | dipeptidyl peptidase IV inhibitor       | 1             | TL | [11-12]       |       |
|                   | 9496               | DPP-III inhibitor                                    | dipeptidyl peptidase III inhibitor      | 1             | HP | [4-5]         |       |
|                   | 10744              | Hypouricemic peptide                                 | hypouricemic                            | 1             | TL | [11-12]       |       |
|                   | IITHPNFNGNTLDNDIML | 7624                                                 | ACE inhibitor                           | ACE inhibitor | 1  | NG            | [8-9] |
|                   |                    | 7683                                                 | ACE inhibitor from garlic               | ACE inhibitor | 1  | NF            | [6-7] |
|                   |                    | 7842                                                 | ACE inhibitor                           | ACE inhibitor | 1  | HP            | [4-5] |
|                   |                    | 8325                                                 | Glucose uptake stimulating peptide      | stimulating   | 1  | II            | [1-2] |

|                     |       |                                                      |                                         |   |    |         |
|---------------------|-------|------------------------------------------------------|-----------------------------------------|---|----|---------|
|                     | 8520  | dipeptidyl peptidase IV inhibitor (DPP IV inhibitor) | dipeptidyl peptidase IV inhibitor       | 1 | HP | [4-5]   |
|                     | 8766  | dipeptidyl peptidase IV inhibitor (DPP IV inhibitor) | dipeptidyl peptidase IV inhibitor       | 1 | DN | [13-14] |
|                     | 8778  | dipeptidyl peptidase IV inhibitor (DPP IV inhibitor) | dipeptidyl peptidase IV inhibitor       | 1 | FN | [7-8]   |
|                     | 8801  | dipeptidyl peptidase IV inhibitor (DPP IV inhibitor) | dipeptidyl peptidase IV inhibitor       | 1 | II | [1-2]   |
|                     | 8803  | dipeptidyl peptidase IV inhibitor (DPP IV inhibitor) | dipeptidyl peptidase IV inhibitor       | 1 | IM | [16-17] |
|                     | 8832  | dipeptidyl peptidase IV inhibitor (DPP IV inhibitor) | dipeptidyl peptidase IV inhibitor       | 1 | ML | [17-18] |
|                     | 8840  | dipeptidyl peptidase IV inhibitor (DPP IV inhibitor) | dipeptidyl peptidase IV inhibitor       | 1 | ND | [14-15] |
|                     | 8842  | dipeptidyl peptidase IV inhibitor (DPP IV inhibitor) | dipeptidyl peptidase IV inhibitor       | 1 | NF | [6-7]   |
|                     | 8843  | dipeptidyl peptidase IV inhibitor (DPP IV inhibitor) | dipeptidyl peptidase IV inhibitor       | 1 | NG | [8-9]   |
|                     | 8850  | dipeptidyl peptidase IV inhibitor (DPP IV inhibitor) | dipeptidyl peptidase IV inhibitor       | 1 | NT | [10-11] |
|                     | 8860  | dipeptidyl peptidase IV inhibitor (DPP IV inhibitor) | dipeptidyl peptidase IV inhibitor       | 1 | PN | [5-6]   |
|                     | 8902  | dipeptidyl peptidase IV inhibitor (DPP IV inhibitor) | dipeptidyl peptidase IV inhibitor       | 1 | TH | [3-4]   |
|                     | 8905  | dipeptidyl peptidase IV inhibitor (DPP IV inhibitor) | dipeptidyl peptidase IV inhibitor       | 1 | TL | [11-12] |
|                     | 9496  | DPP-III inhibitor                                    | dipeptidyl peptidase III inhibitor      | 1 | HP | [4-5]   |
|                     | 10744 | Hypouricemic peptide                                 | hypouricemic                            | 1 | TL |         |
| SNSAEDPFIAIH        | 7562  | ACE inhibitor from soy hydrolysate                   | ACE inhibitor                           | 1 | IA | [9-10]  |
|                     | 8193  | ACE inhibitor                                        | ACE inhibitor                           | 1 | AI | [10-11] |
|                     | 8525  | dipeptidyl peptidase IV inhibitor (DPP IV inhibitor) | dipeptidyl peptidase IV inhibitor       | 1 | IA | [9-10]  |
|                     | 8758  | dipeptidyl peptidase IV inhibitor (DPP IV inhibitor) | dipeptidyl peptidase IV inhibitor       | 1 | AE | [4-5]   |
|                     | 8767  | dipeptidyl peptidase IV inhibitor (DPP IV inhibitor) | dipeptidyl peptidase IV inhibitor       | 1 | DP | [6-7]   |
|                     | 8800  | dipeptidyl peptidase IV inhibitor (DPP IV inhibitor) | dipeptidyl peptidase IV inhibitor       | 1 | IH | [11-12] |
|                     | 8854  | dipeptidyl peptidase IV inhibitor (DPP IV inhibitor) | dipeptidyl peptidase IV inhibitor       | 1 | PF | [7-8]   |
|                     | 9497  | DPP-III inhibitor                                    | dipeptidyl peptidase III inhibitor      | 1 | IH | [11-12] |
|                     | 9505  | DPP-III inhibitor                                    | dipeptidyl peptidase III inhibitor      | 1 | PF | [7-8]   |
|                     | 10460 | ACE2 inhibitor                                       | ACE2 inhibitor                          | 1 | PF | [7-8]   |
|                     | 10905 | Neprilysin inhibitor                                 | neprilysin inhibitor                    | 1 | AE | [4-5]   |
|                     | 10635 | Glutamate carboxypeptidase II inhibitor              | glutamate carboxypeptidase II inhibitor | 1 | AE | [4-5]   |
| GEHNIDVLEGNEQFINAAK | 7590  | ACE inhibitor                                        | ACE inhibitor                           | 1 | AA | [17-18] |
|                     | 7615  | ACE inhibitor                                        | ACE inhibitor                           | 1 | GE | [1-2]   |
|                     | 7622  | ACE inhibitor                                        | ACE inhibitor                           | 1 | EG | [9-10]  |

|                |       |                                                      |                                            |   |    |         |
|----------------|-------|------------------------------------------------------|--------------------------------------------|---|----|---------|
|                | 10920 | ACE inhibitor                                        | ACE inhibitor                              | 1 | AK | [18-19] |
|                | 10663 | Antibacterial peptide                                | antibacterial                              | 1 | AA | [17-18] |
|                | 8320  | Glucose uptake stimulating peptide                   | stimulating                                | 1 | VL | [7-8]   |
|                | 10795 | Neuropeptide                                         | neuropeptide                               | 1 | EG | [9-10]  |
|                | 10794 | Calcium binding peptide                              | binding                                    | 1 | EG | [9-10]  |
|                | 10141 | Hypotensive peptide                                  | hypotensive                                | 1 | AA | [17-18] |
|                | 8637  | dipeptidyl peptidase IV inhibitor (DPP IV inhibitor) | dipeptidyl peptidase IV inhibitor          | 1 | AA | [17-18] |
|                | 8770  | dipeptidyl peptidase IV inhibitor (DPP IV inhibitor) | dipeptidyl peptidase IV inhibitor          | 1 | EG | [9-10]  |
|                | 8771  | dipeptidyl peptidase IV inhibitor (DPP IV inhibitor) | dipeptidyl peptidase IV inhibitor          | 1 | EH | [2-3]   |
|                | 8781  | dipeptidyl peptidase IV inhibitor (DPP IV inhibitor) | dipeptidyl peptidase IV inhibitor          | 1 | GE | [1-2]   |
|                | 8804  | dipeptidyl peptidase IV inhibitor (DPP IV inhibitor) | dipeptidyl peptidase IV inhibitor          | 1 | IN | [15-16] |
|                | 8839  | dipeptidyl peptidase IV inhibitor (DPP IV inhibitor) | dipeptidyl peptidase IV inhibitor          | 1 | NA | [16-17] |
|                | 8841  | dipeptidyl peptidase IV inhibitor (DPP IV inhibitor) | dipeptidyl peptidase IV inhibitor          | 1 | NE | [11-12] |
|                | 8870  | dipeptidyl peptidase IV inhibitor (DPP IV inhibitor) | dipeptidyl peptidase IV inhibitor          | 1 | QF | [13-14] |
|                | 8922  | dipeptidyl peptidase IV inhibitor (DPP IV inhibitor) | dipeptidyl peptidase IV inhibitor          | 1 | VL | [7-8]   |
|                | 9487  | DPP-III inhibitor                                    | dipeptidyl peptidase III inhibitor         | 1 | GE | [1-2]   |
|                | 9431  | Renin inhibitor                                      | renin inhibitor                            | 1 | QF | [13-14] |
|                | 10659 | Inhibitor of tripeptidyl peptidase II                | inhibitor of tripeptidyl peptidase II      | 1 | AA | [17-18] |
|                | 10906 | Neprilysin inhibitor                                 | neprilysin inhibitor                       | 1 | AK | [18-19] |
|                | 10911 | Neprilysin inhibitor                                 | neprilysin inhibitor                       | 1 | GE | [1-2]   |
|                | 10623 | Glutamate carboxypeptidase inhibitor                 | glutamate carboxypeptidase inhibitor       | 1 | GE | [1-2]   |
|                | 10654 | Glutamate carboxypeptidase II inhibitor              | glutamate carboxypeptidase II inhibitor    | 1 | GE | [1-2]   |
|                | 10611 | Inhibitor of cytosol alanyl aminopeptidase           | inhibitor of cytosol alanyl aminopeptidase | 1 | AA | [17-18] |
|                | 10664 | Inhibitor of D-Ala-D-Ala dipeptidase                 | D-Ala-D-Ala dipeptidase inhibitor          | 1 | AA | [17-18] |
| SISNSAEDPFIAIH | 7562  | ACE inhibitor from soy hydrolysate                   | ACE inhibitor                              | 1 | IA | [11-12] |
|                | 8193  | ACE inhibitor                                        | ACE inhibitor                              | 1 | AI | [12-13] |
|                | 8525  | dipeptidyl peptidase IV inhibitor (DPP IV inhibitor) | dipeptidyl peptidase IV inhibitor          | 1 | IA | [11-12] |
|                | 8758  | dipeptidyl peptidase IV inhibitor (DPP IV inhibitor) | dipeptidyl peptidase IV inhibitor          | 1 | AE | [6-7]   |
|                | 8767  | dipeptidyl peptidase IV inhibitor (DPP IV inhibitor) | dipeptidyl peptidase IV inhibitor          | 1 | DP | [8-9]   |
|                | 8800  | dipeptidyl peptidase IV inhibitor (DPP IV inhibitor) | dipeptidyl peptidase IV inhibitor          | 1 | IH | [13-14] |

|                  |       |                                                      |                                         |   |    |             |
|------------------|-------|------------------------------------------------------|-----------------------------------------|---|----|-------------|
|                  | 8854  | dipeptidyl peptidase IV inhibitor (DPP IV inhibitor) | dipeptidyl peptidase IV inhibitor       | 1 | PF | [9-10]      |
|                  | 8893  | dipeptidyl peptidase IV inhibitor (DPP IV inhibitor) | dipeptidyl peptidase IV inhibitor       | 1 | SI | [1-2]       |
|                  | 9497  | DPP-III inhibitor                                    | dipeptidyl peptidase III inhibitor      | 1 | IH | [13-14]     |
|                  | 9505  | DPP-III inhibitor                                    | dipeptidyl peptidase III inhibitor      | 1 | PF | [9-10]      |
|                  | 10460 | ACE2 inhibitor                                       | ACE2 inhibitor                          | 1 | PF | [9-10]      |
|                  | 10905 | Neprilysin inhibitor                                 | neprilysin inhibitor                    | 1 | AE | [6-7]       |
|                  | 10635 | Glutamate carboxypeptidase II inhibitor              | glutamate carboxypeptidase II inhibitor | 1 | AE | [6-7]       |
| NWGEGWGFMPDR     | 7579  | ACE inhibitor                                        | ACE inhibitor                           | 1 | GW | [5-6]       |
|                  | 7591  | ACE inhibitor                                        | ACE inhibitor                           | 1 | GF | [7-8]       |
|                  | 7613  | ACE inhibitor                                        | ACE inhibitor                           | 2 | WG | [2-3],[6-7] |
|                  | 7615  | ACE inhibitor                                        | ACE inhibitor                           | 1 | GE | [3-4]       |
|                  | 7622  | ACE inhibitor                                        | ACE inhibitor                           | 1 | EG | [4-5]       |
|                  | 10091 | ACE inhibitor                                        | ACE inhibitor                           | 1 | DR | [12-13]     |
|                  | 10795 | Neuropeptide                                         | neuropeptide                            | 1 | EG | [4-5]       |
|                  | 9082  | antioxidative peptide                                | antioxidative                           | 2 | WG | [2-3],[6-7] |
|                  | 10472 | antioxidative peptide                                | antioxidative                           | 1 | GW | [5-6]       |
|                  | 10794 | Calcium binding peptide                              | binding                                 | 1 | EG | [4-5]       |
|                  | 10911 | Neprilysin inhibitor                                 | neprilysin inhibitor                    | 1 | GE | [3-4]       |
| SISNSAEDPFIAIHA  | 7562  | ACE inhibitor from soy hydrolysate                   | ACE inhibitor                           | 1 | IA | [11-12]     |
|                  | 8193  | ACE inhibitor                                        | ACE inhibitor                           | 1 | AI | [12-13]     |
|                  | 10460 | ACE2 inhibitor                                       | ACE2 inhibitor                          | 1 | PF | [9-10]      |
|                  | 10905 | Neprilysin inhibitor                                 | neprilysin inhibitor                    | 1 | AE | [6-7]       |
| SNSAEDPFIAIHAESK | 7562  | ACE inhibitor from soy hydrolysate                   | ACE inhibitor                           | 1 | IA | [9-10]      |
|                  | 8193  | ACE inhibitor                                        | ACE inhibitor                           | 1 | AI | [10-11]     |
|                  | 10460 | ACE2 inhibitor                                       | ACE2 inhibitor                          | 1 | PF | [7-8]       |
| KNWGEGWGFMPDR    | 7579  | ACE inhibitor                                        | ACE inhibitor                           | 1 | GW | [6-7]       |
|                  | 7591  | ACE inhibitor                                        | ACE inhibitor                           | 1 | GF | [8-9]       |
|                  | 7613  | ACE inhibitor                                        | ACE inhibitor                           | 2 | WG | [3-4],[7-8] |
|                  | 7615  | ACE inhibitor                                        | ACE inhibitor                           | 1 | GE | [4-5]       |
|                  | 7622  | ACE inhibitor                                        | ACE inhibitor                           | 1 | EG | [5-6]       |

|                      |       |                                    |                      |   |    |             |
|----------------------|-------|------------------------------------|----------------------|---|----|-------------|
| LGEHNIDVLEGNEQFINAAK | 10795 | Neuropeptide                       | neuropeptide         | 1 | EG | [5-6]       |
|                      | 9082  | antioxidative peptide              | antioxidative        | 2 | WG | [3-4],[7-8] |
|                      | 10472 | antioxidative peptide              | antioxidative        | 1 | GW | [6-7]       |
|                      | 10794 | Calcium binding peptide            | binding              | 1 | EG | [5-6]       |
|                      | 10701 | Renin inhibitor                    | renin inhibitor      | 2 | WG | [3-4],[7-8] |
|                      | 7590  | ACE inhibitor                      | ACE inhibitor        | 1 | AA | [18-19]     |
|                      | 7615  | ACE inhibitor                      | ACE inhibitor        | 1 | GE | [2-3]       |
|                      | 7619  | ACE inhibitor                      | ACE inhibitor        | 1 | LG | [1-2]       |
|                      | 7622  | ACE inhibitor                      | ACE inhibitor        | 1 | EG | [10-11]     |
|                      | 10920 | ACE inhibitor                      | ACE inhibitor        | 1 | AK | [19-20]     |
|                      | 10663 | Antibacterial peptide              | antibacterial        | 1 | AA | [18-19]     |
|                      | 8320  | Glucose uptake stimulating peptide | stimulating          | 1 | VL | [8-9]       |
|                      | 10795 | Neuropeptide                       | neuropeptide         | 1 | EG | [10-11]     |
|                      | 10794 | Calcium binding peptide            | binding              | 1 | EG | [10-11]     |
| LGEHNIDVLEGNEQFINAA  | 10141 | Hypotensive peptide                | hypotensive          | 1 | AA | [18-19]     |
|                      | 9431  | Renin inhibitor                    | renin inhibitor      | 1 | QF | [14-15]     |
|                      | 10906 | Neprilysin inhibitor               | neprilysin inhibitor | 1 | AK | [19-20]     |
|                      | 10911 | Neprilysin inhibitor               | neprilysin inhibitor | 1 | GE | [2-3]       |
|                      | 7590  | ACE inhibitor                      | ACE inhibitor        | 1 | AA | [18-19]     |
|                      | 7615  | ACE inhibitor                      | ACE inhibitor        | 1 | GE | [2-3]       |
|                      | 7619  | ACE inhibitor                      | ACE inhibitor        | 1 | LG | [1-2]       |
|                      | 7622  | ACE inhibitor                      | ACE inhibitor        | 1 | EG | [10-11]     |
|                      | 10663 | Antibacterial peptide              | antibacterial        | 1 | AA | [18-19]     |
|                      | 8320  | Glucose uptake stimulating peptide | stimulating          | 1 | VL | [8-9]       |
|                      | 10795 | Neuropeptide                       | neuropeptide         | 1 | EG | [10-11]     |
|                      | 10794 | Calcium binding peptide            | binding              | 1 | EG | [10-11]     |
|                      | 10141 | Hypotensive peptide                | hypotensive          | 1 | AA | [18-19]     |
|                      | 9431  | Renin inhibitor                    | renin inhibitor      | 1 | QF | [14-15]     |
| IITHPNFNGNTLDNDIMLIK | 10911 | Neprilysin inhibitor               | neprilysin inhibitor | 1 | GE | [2-3]       |
|                      | 7624  | ACE inhibitor                      | ACE inhibitor        | 1 | NG | [8-9]       |

|                     |       |                                     |                      |   |    |               |
|---------------------|-------|-------------------------------------|----------------------|---|----|---------------|
|                     | 7683  | ACE inhibitor from garlic           | ACE inhibitor        | 1 | NF | [6-7]         |
|                     | 7842  | ACE inhibitor                       | ACE inhibitor        | 1 | HP | [4-5]         |
|                     | 8324  | Glucose uptake stimulating peptide  | stimulating          | 1 | LI | [18-19]       |
|                     | 8325  | Glucose uptake stimulating peptide  | stimulating          | 1 | II | [1-2]         |
|                     | 10744 | Hypouricemic peptide                | hypouricemic         | 1 | TL | [11-12]       |
| SISNSAEDPFLAIHAESKL | 7562  | ACE inhibitor from soy hydrolysate  | ACE inhibitor        | 1 | IA | [11-12]       |
|                     | 8193  | ACE inhibitor                       | ACE inhibitor        | 1 | AI | [12-13]       |
|                     | 7693  | ACE inhibitor from wakame           | ACE inhibitor        | 1 | KL | [18-19]       |
|                     | 10460 | ACE2 inhibitor                      | ACE2 inhibitor       | 1 | PF | [9-10]        |
|                     | 10905 | Neprilysin inhibitor                | neprilysin inhibitor | 2 | AE | [6-7],[15-16] |
| THPNFNGNTLDNDIMLIK  | 7624  | ACE inhibitor                       | ACE inhibitor        | 1 | NG | [6-7]         |
|                     | 7683  | ACE inhibitor from garlic           | ACE inhibitor        | 1 | NF | [4-5]         |
|                     | 7842  | ACE inhibitor                       | ACE inhibitor        | 1 | HP | [2-3]         |
|                     | 8324  | Glucose uptake stimulating peptide  | stimulating          | 1 | LI | [16-17]       |
|                     | 10744 | Hypouricemic peptide                | hypouricemic         | 1 | TL | [9-10]        |
| MSYLKNWGEWGFMPDR    | 3550  | ACE inhibitor (from bovine beta-Lg) | ACE inhibitor        | 1 | YL | [3-4]         |
|                     | 7579  | ACE inhibitor                       | ACE inhibitor        | 1 | GW | [10-11]       |
|                     | 7591  | ACE inhibitor                       | ACE inhibitor        | 1 | GF | [12-13]       |
|                     | 7613  | ACE inhibitor                       | ACE inhibitor        | 2 | WG | [7-8],[11-12] |
|                     | 7615  | ACE inhibitor                       | ACE inhibitor        | 1 | GE | [8-9]         |
|                     | 7622  | ACE inhibitor                       | ACE inhibitor        | 1 | EG | [9-10]        |
|                     | 7684  | ACE inhibitor from garlic           | ACE inhibitor        | 1 | SY | [2-3]         |
|                     | 10091 | ACE inhibitor                       | ACE inhibitor        | 1 | DR | [17-18]       |
|                     | 8310  | Anxiolytic peptide                  | neuropeptide         | 1 | YL | [3-4]         |
|                     | 10795 | Neuropeptide                        | neuropeptide         | 1 | EG | [9-10]        |
|                     | 8217  | antioxidative peptide               | antioxidative        | 1 | LK | [4-5]         |
|                     | 9082  | antioxidative peptide               | antioxidative        | 2 | WG | [7-8],[11-12] |
|                     | 10472 | antioxidative peptide               | antioxidative        | 1 | GW | [10-11]       |
|                     | 10733 | antioxidative peptide               | antioxidative        | 1 | YL | [3-4]         |
|                     | 10794 | Calcium binding peptide             | binding              | 1 | EG | [9-10]        |

A: alanine; C: cysteine; D: aspartic acid; E: glutamic acid; F: phenylalanine; G: glycine; H: histidine; I: isoleucine; K: lysine; L: leucine; M: methionine; N: asparagine; P: proline; Q: glutamine; R: arginine; S: serine; T: threonine; V: valine; W: tryptophan; Y: tyrosine.
